# Supplementary material for: Selective aliphatic carbon–hydrogen bond activation of protected alcohol substrates by cytochrome P450 enzymes
Source: Royal Society of Chemistry journal article supplement (doi:10.1039/c3ob42417k), 2014-01-01

## Supporting information

### Synthesis of Substrates **1-3**

Substrates **1-3** were synthesised using standard methods (Fig. 1) and purified via flash chromatography. Cyclohexyloxymethyl benzene (**1**) was synthesised by adding benzylbromide and diisopropylethylamine to a solution of cyclohexanol and heating under reflux for 2 hours at 150 °C. Cyclohexyl benzoate (**2**) and 1-cyclohex-2-enyl benzoate (**3**) were synthesised by adding triethylamine and benzoyl chloride to cyclohexanol and cyclohex-2-enol in dichloromethane and stirring for 16 hours at room temperature. The substrates were purified as described in the experimental section and characterised via NMR spectroscopy.

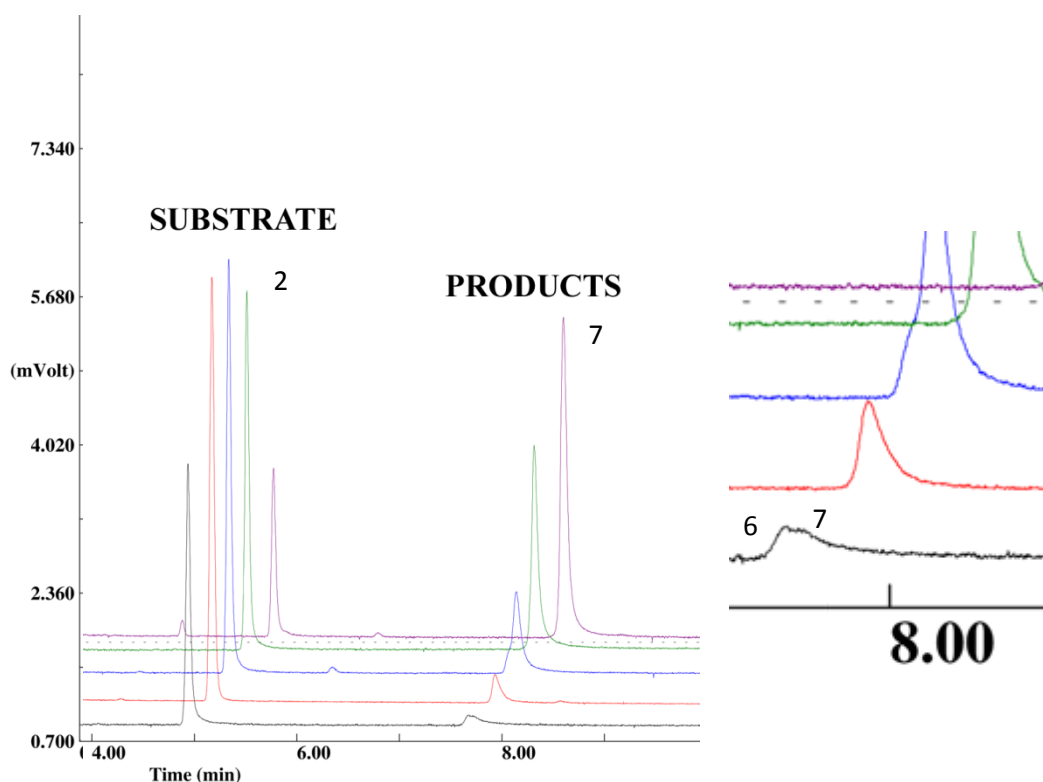

**Figure S1** GC analysis of the turnover of cyclohexyl benzoate (**2**, RT 5.0 min) by different P450cam mutants. The amount of product (RT 7.8 min) is greatest for the Y96A mutant (purple). Lower amounts of product are observed for the F87A/Y96F mutant (green), the Y96F mutant (blue) and the WT enzyme (black). The red chromatogram is from the V247A mutant which alters the selectivity towards the minor product, **6** (85%, Table 2 and Fig. S3). For clarity each GC trace has been offset along the x and y axes. The inset shows an expanded view of the product peak in the chromatogram. Two overlapping peaks can be seen for the WT enzyme (black) and a shoulder can be seen in the Y96F mutant (blue). The Y96A mutant (purple) resulted in the formation of >95% of a single product (**7**, Table 2 and Fig. S3).

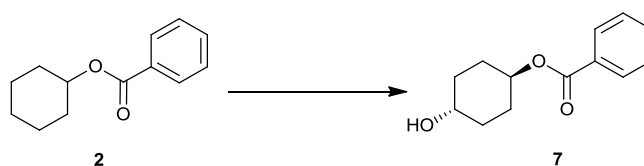

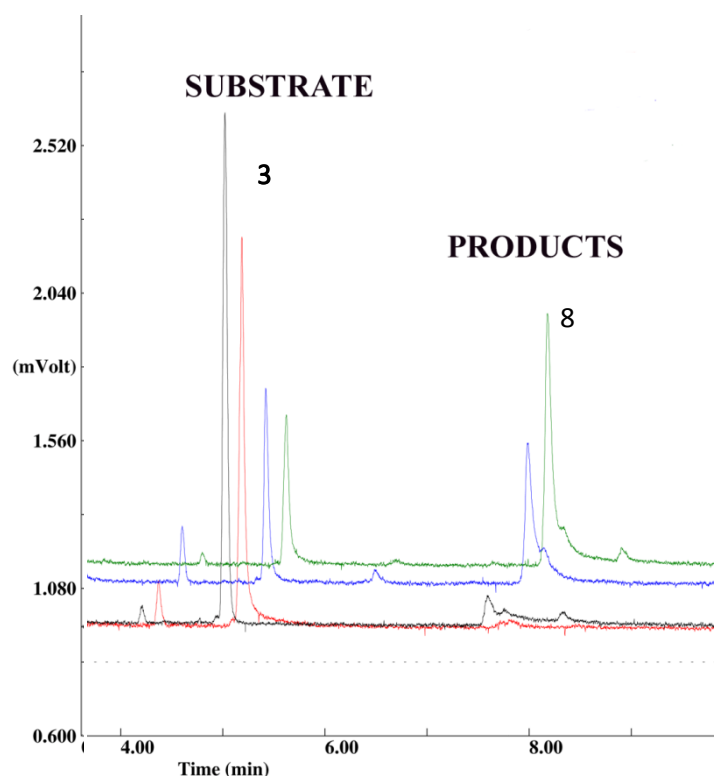

**Figure S2** GC analysis of the turnover of 1-cyclohex-2-enyl benzoate (**3**, RT 4.5 min) by different P450cam mutants. The amount of product (RT 7.7 min) is greatest for the F87A/Y96F mutant (green). Significantly lower amounts of product are observed for the Y96A mutant (black) and the WT enzyme (red) while the F87L/Y96F mutant (blue) generated an intermediate level of product. The F87A/Y96F mutant generates predominantly one product, **8** (>90%). The minor products can be seen in the chromatogram as a shoulder on the peak of the majority product. For clarity each GC trace has been offset along the x and y axes.

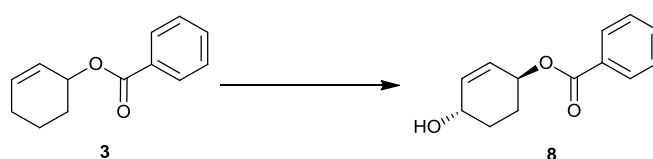

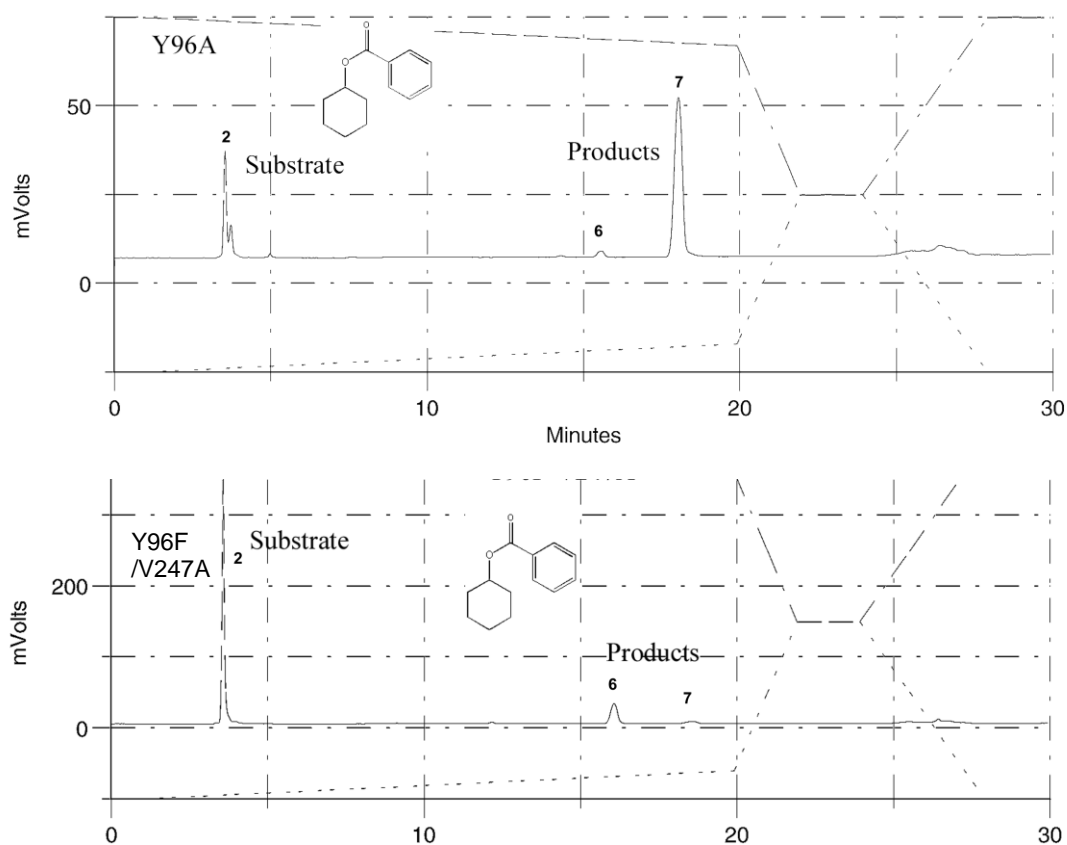

**Figure S3** Normal phase HPLC analysis of the turnover of cyclohexyl benzoate (**2**, RT 4.0 min) by Y96A (top chromatogram) and Y96F/V247A (bottom chromatogram). Two products can be seen in both chromatograms. The major product, **7**, with Y96A (RT 18 min) is formed with >95% selectivity and the minor product (RT 16 min) can be seen. The Y96F/V247A mutant forms an excess of product, **6**, at 16 min (85%) with a smaller amount of the product at 18 min (15%).

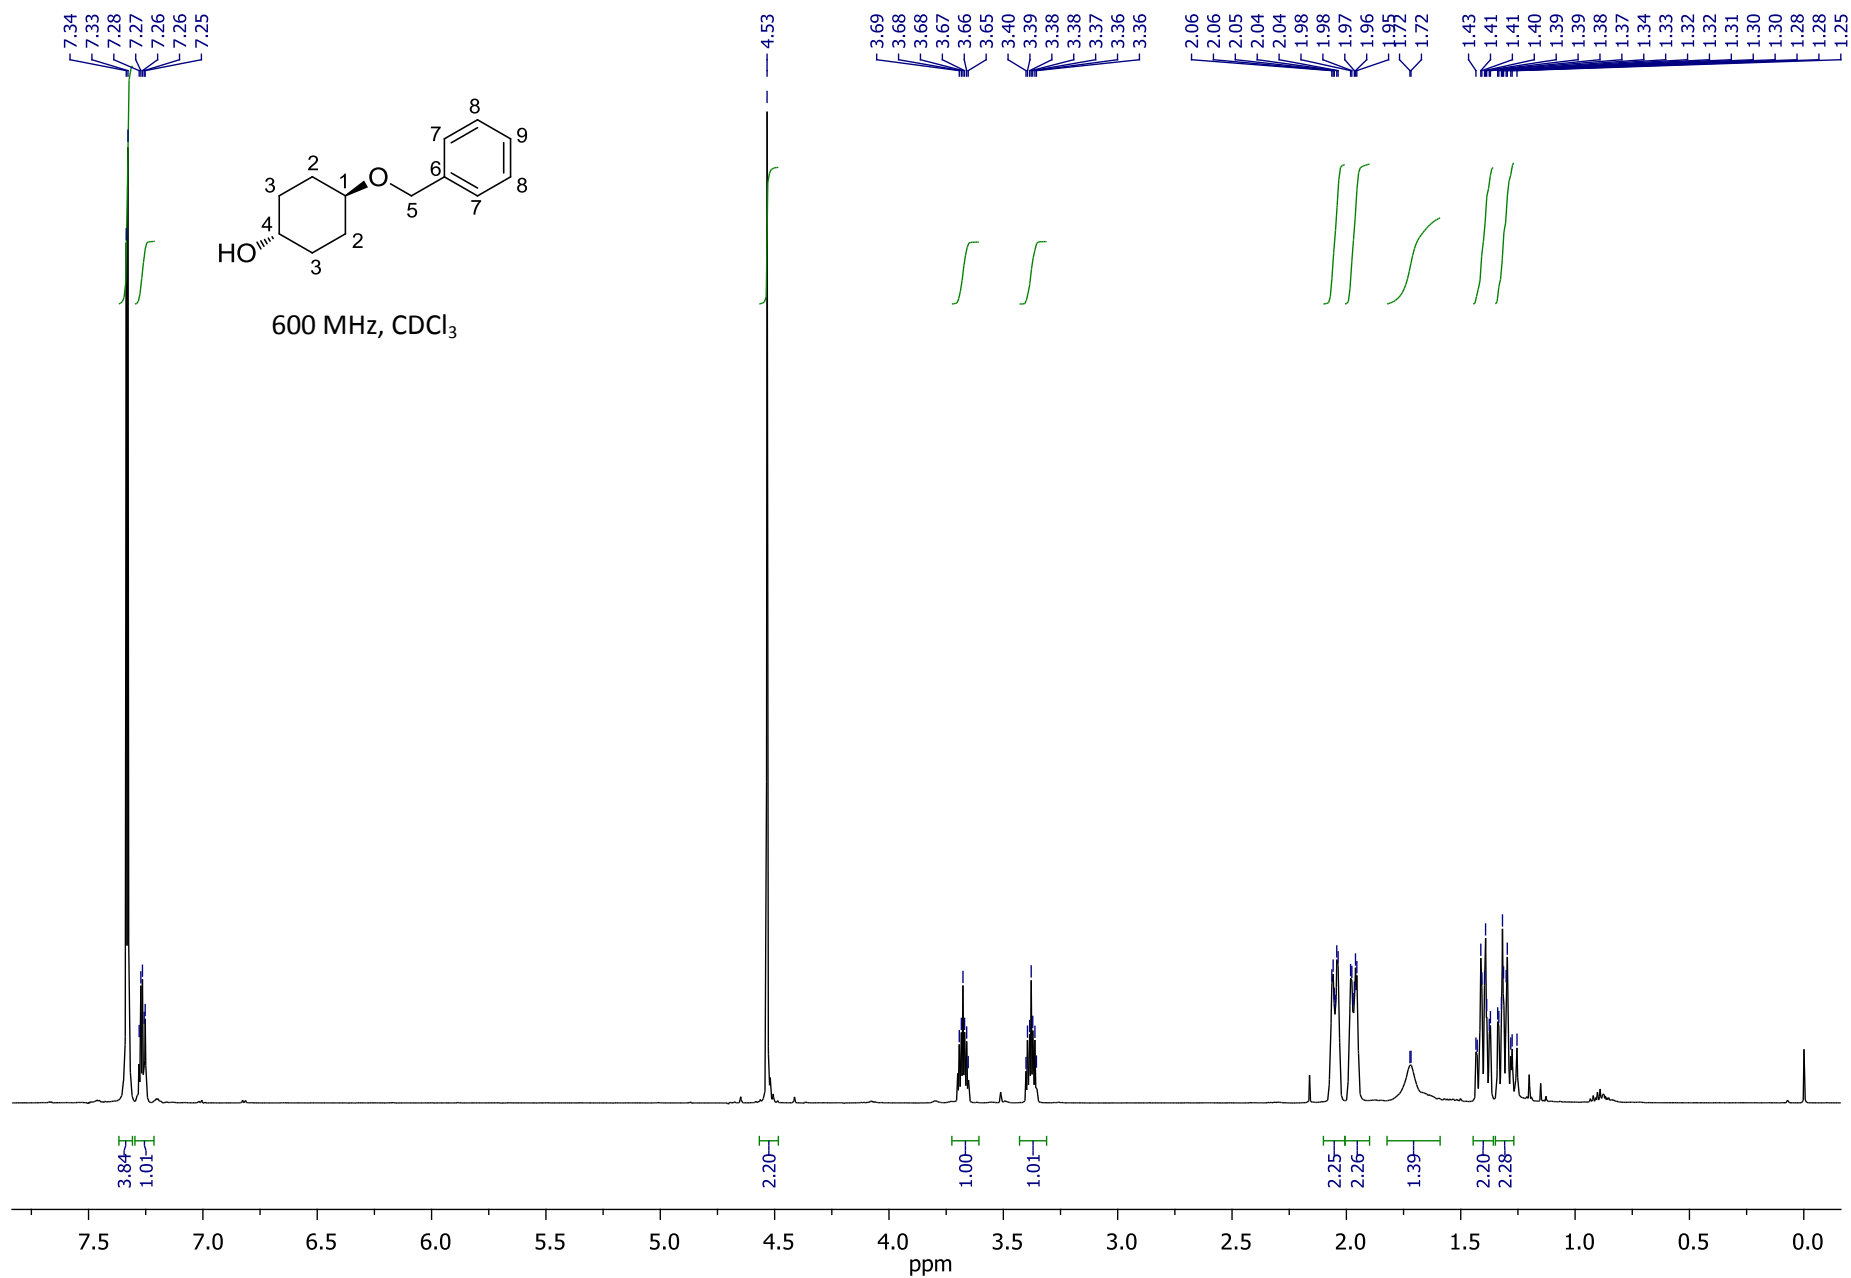

Figure S4a <sup>1</sup>H NMR spectrum of 4-(benzyloxy)cyclohexanol (5)

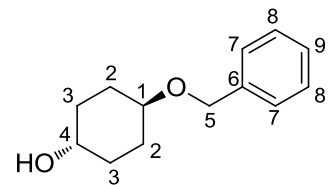

600 MHz, CDCl<sub>3</sub>

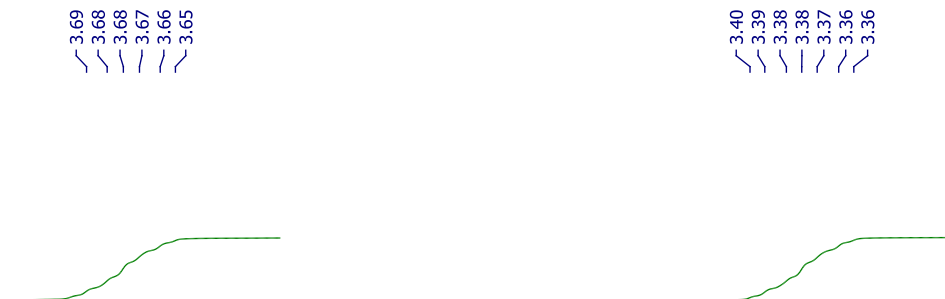

3.69  
3.68  
3.67  
3.66  
3.65

3.40  
3.39  
3.38  
3.37  
3.36

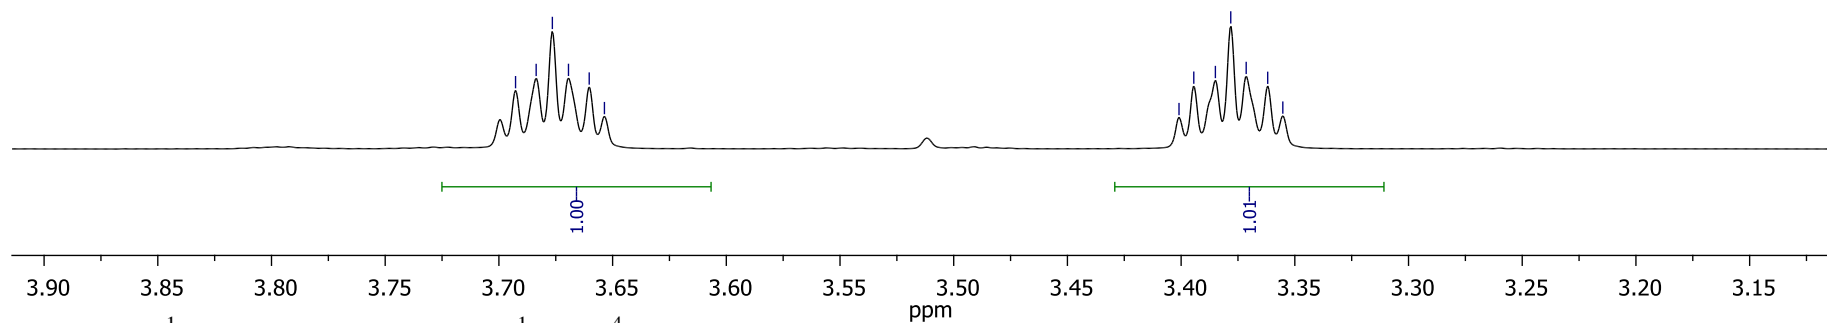

**Figure S4b** <sup>1</sup>H NMR spectrum of the C<sup>1</sup> and C<sup>4</sup> hydrogen region 4-(benzyloxy)cyclohexanol (5)

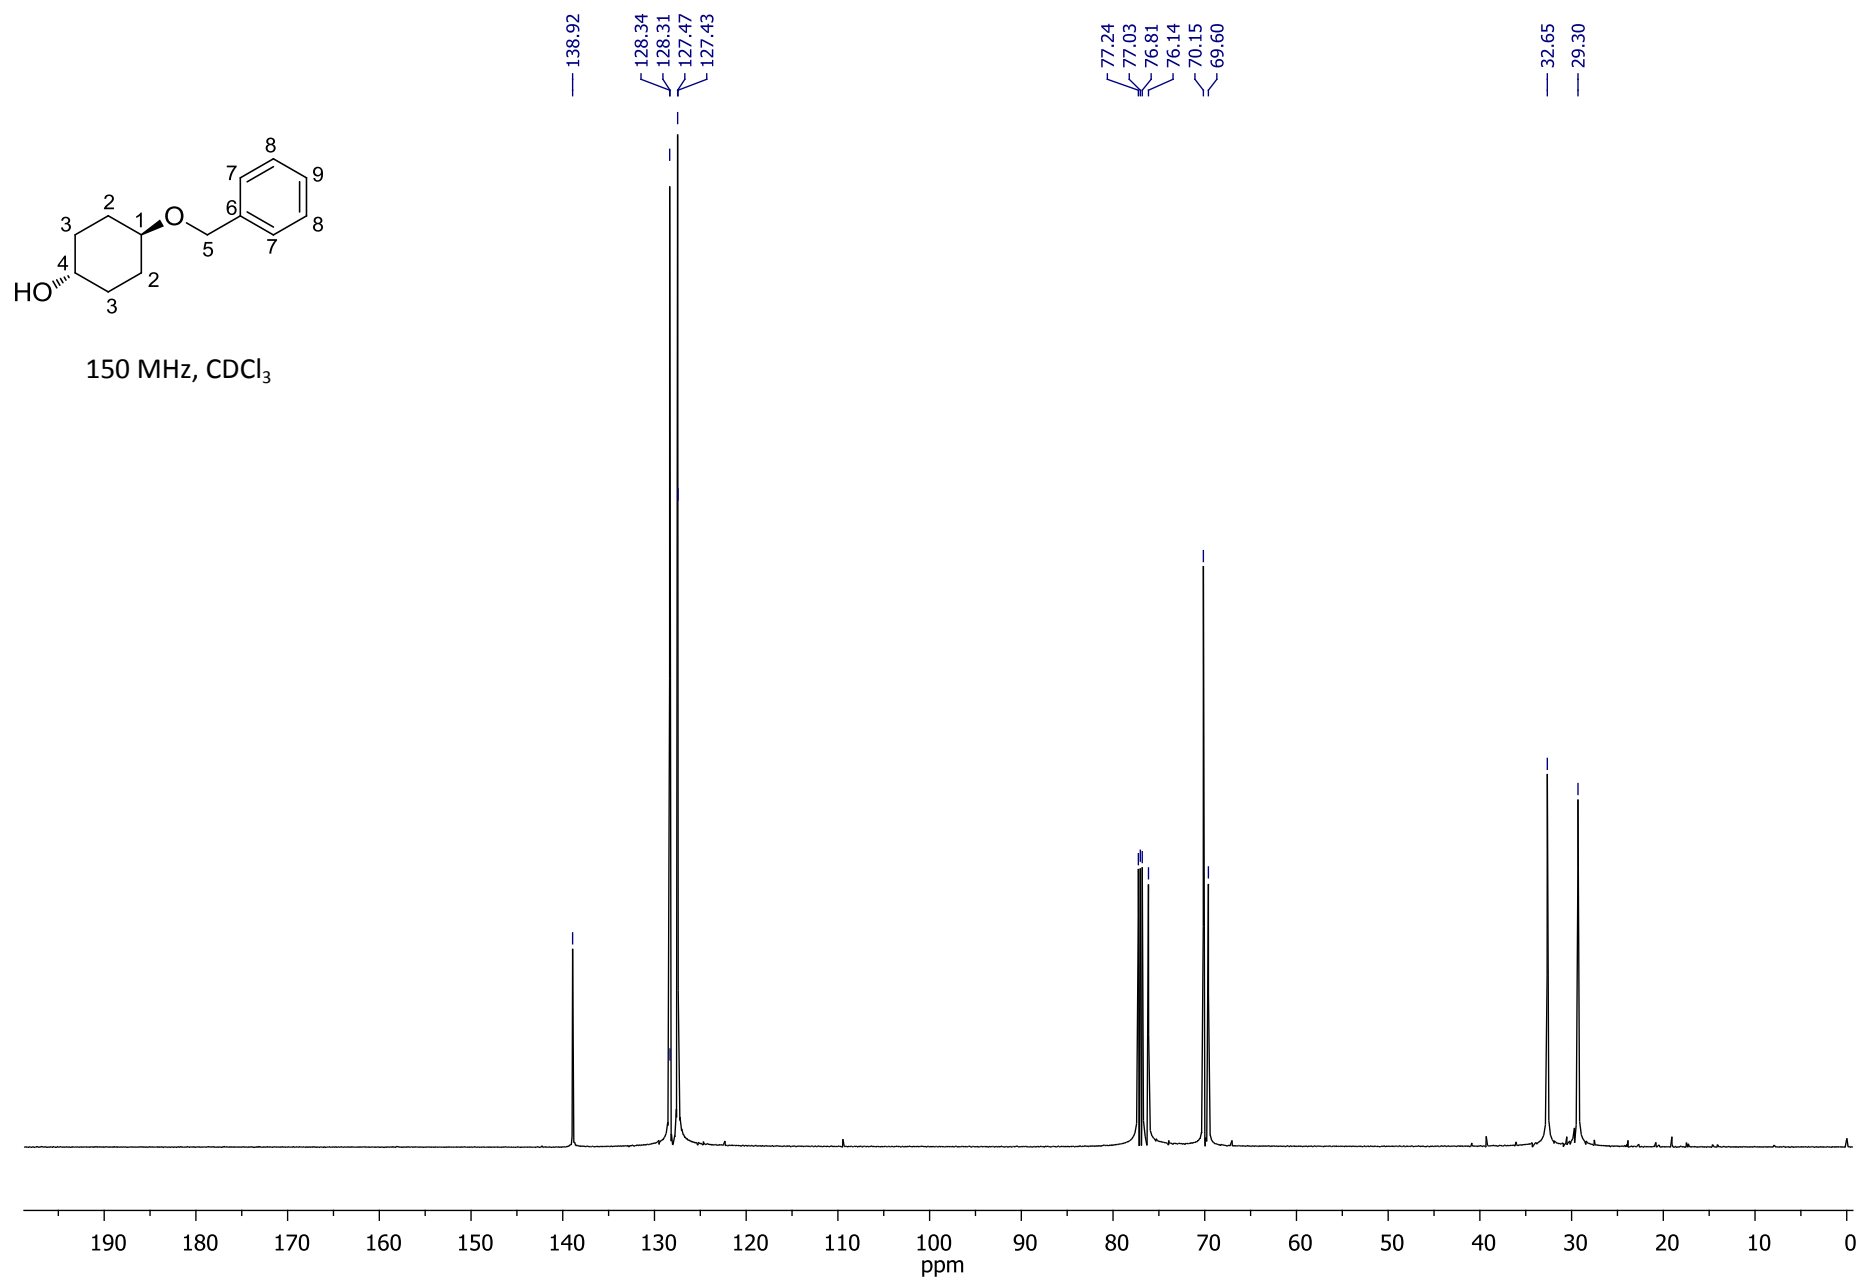

**Figure S4c** <sup>13</sup>C NMR spectrum of 4-(benzyloxy)cyclohexanol (**5**)

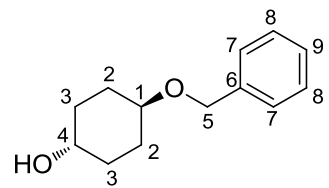

$^1\text{H}$ - $^1\text{H}$  COSY

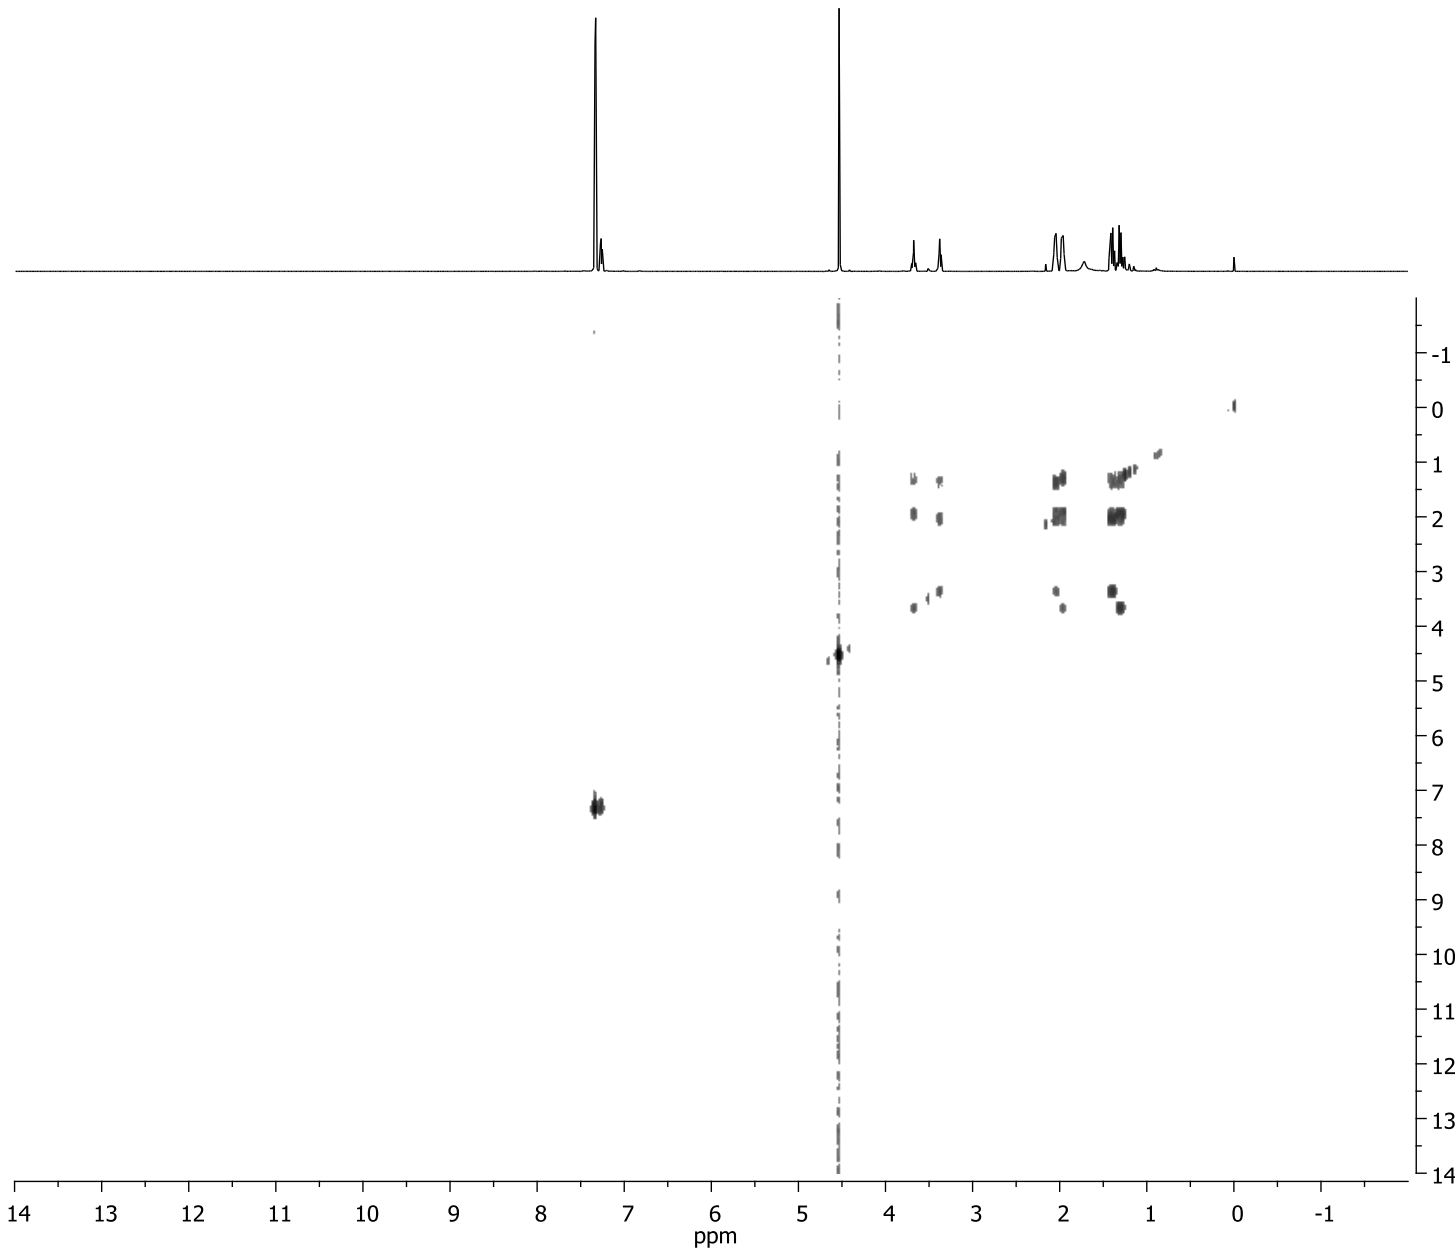

**Figure S4d**  $^1\text{H}$ - $^1\text{H}$  COSY spectrum of 4-(benzyloxy)cyclohexanol (5)



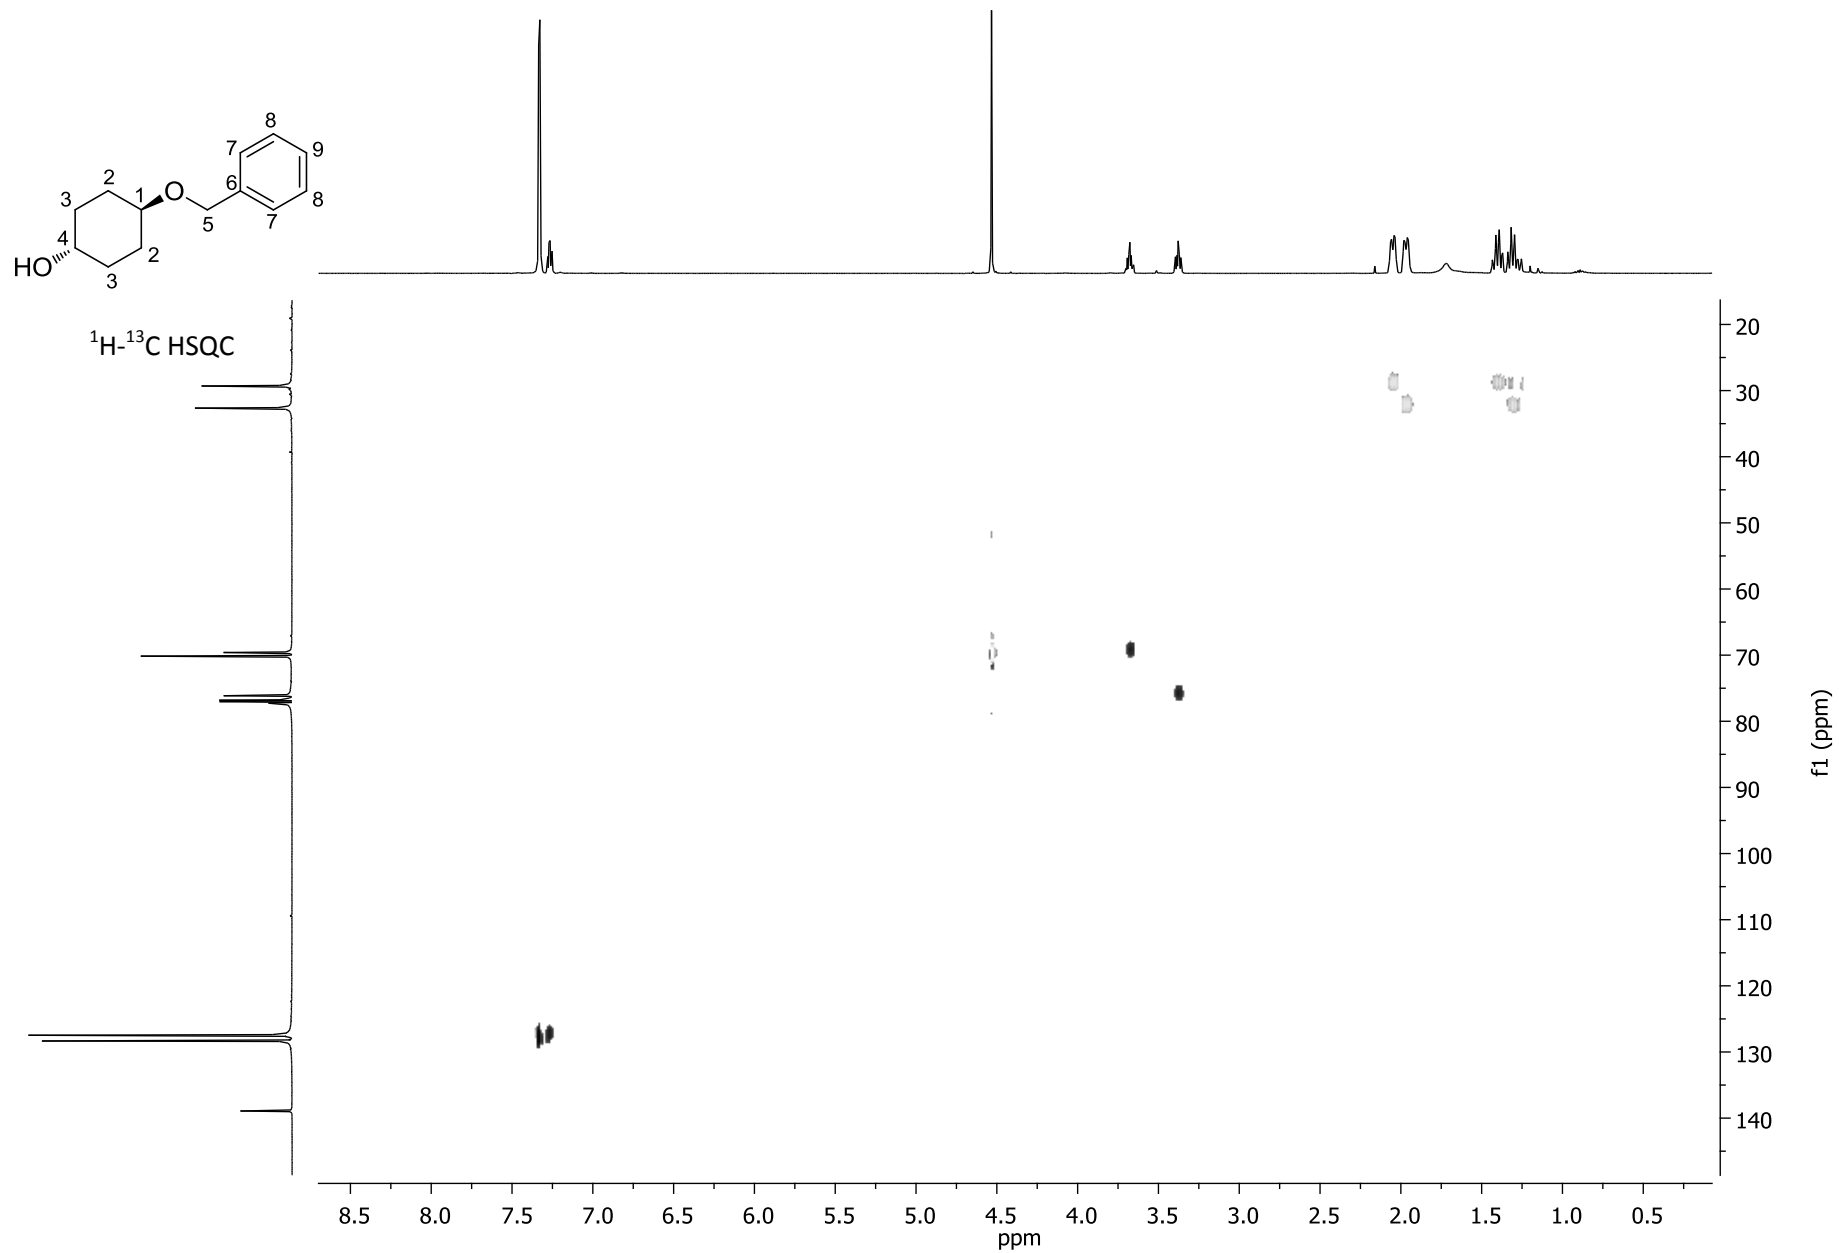

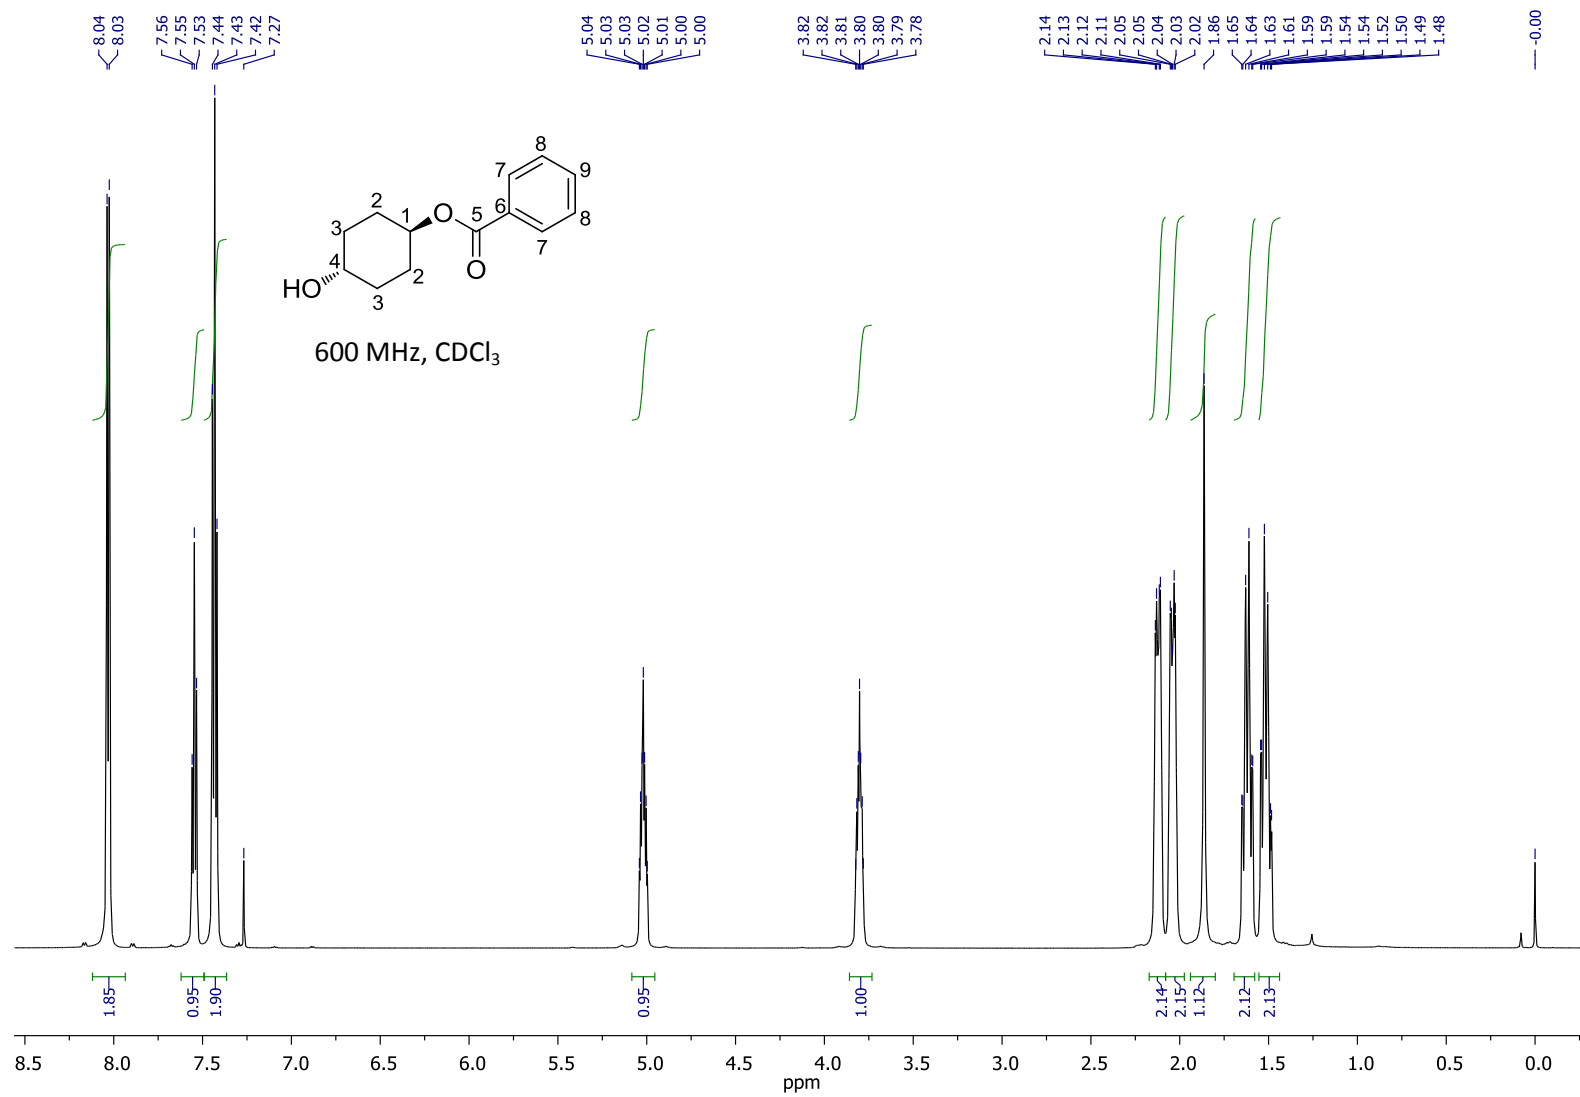

Figure S5a <sup>1</sup>H NMR spectrum of benzoic acid 4-hydroxy-cyclohexyl ester (7)

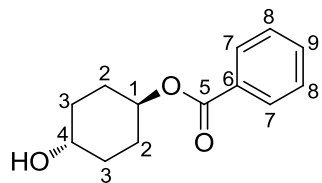

600 MHz, CDCl<sub>3</sub>

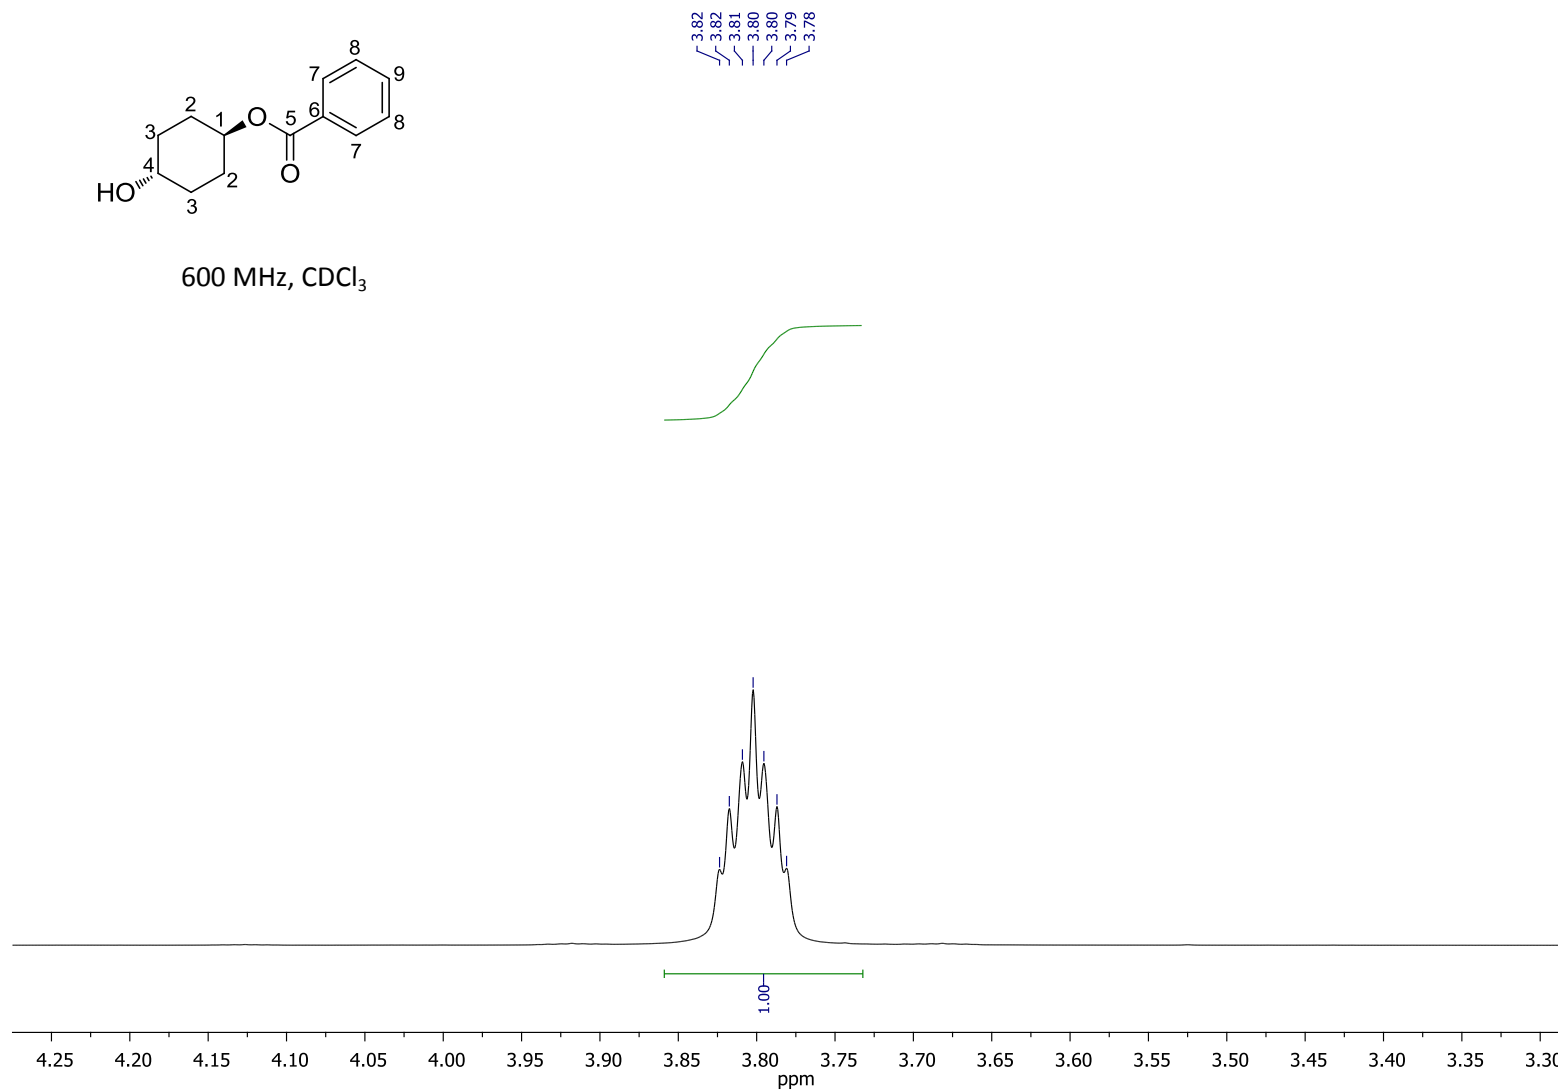

**Figure S5b** <sup>1</sup>H NMR spectrum of the C<sup>1</sup> hydrogen region of benzoic acid 4-hydroxy-cyclohexyl ester (**7**)

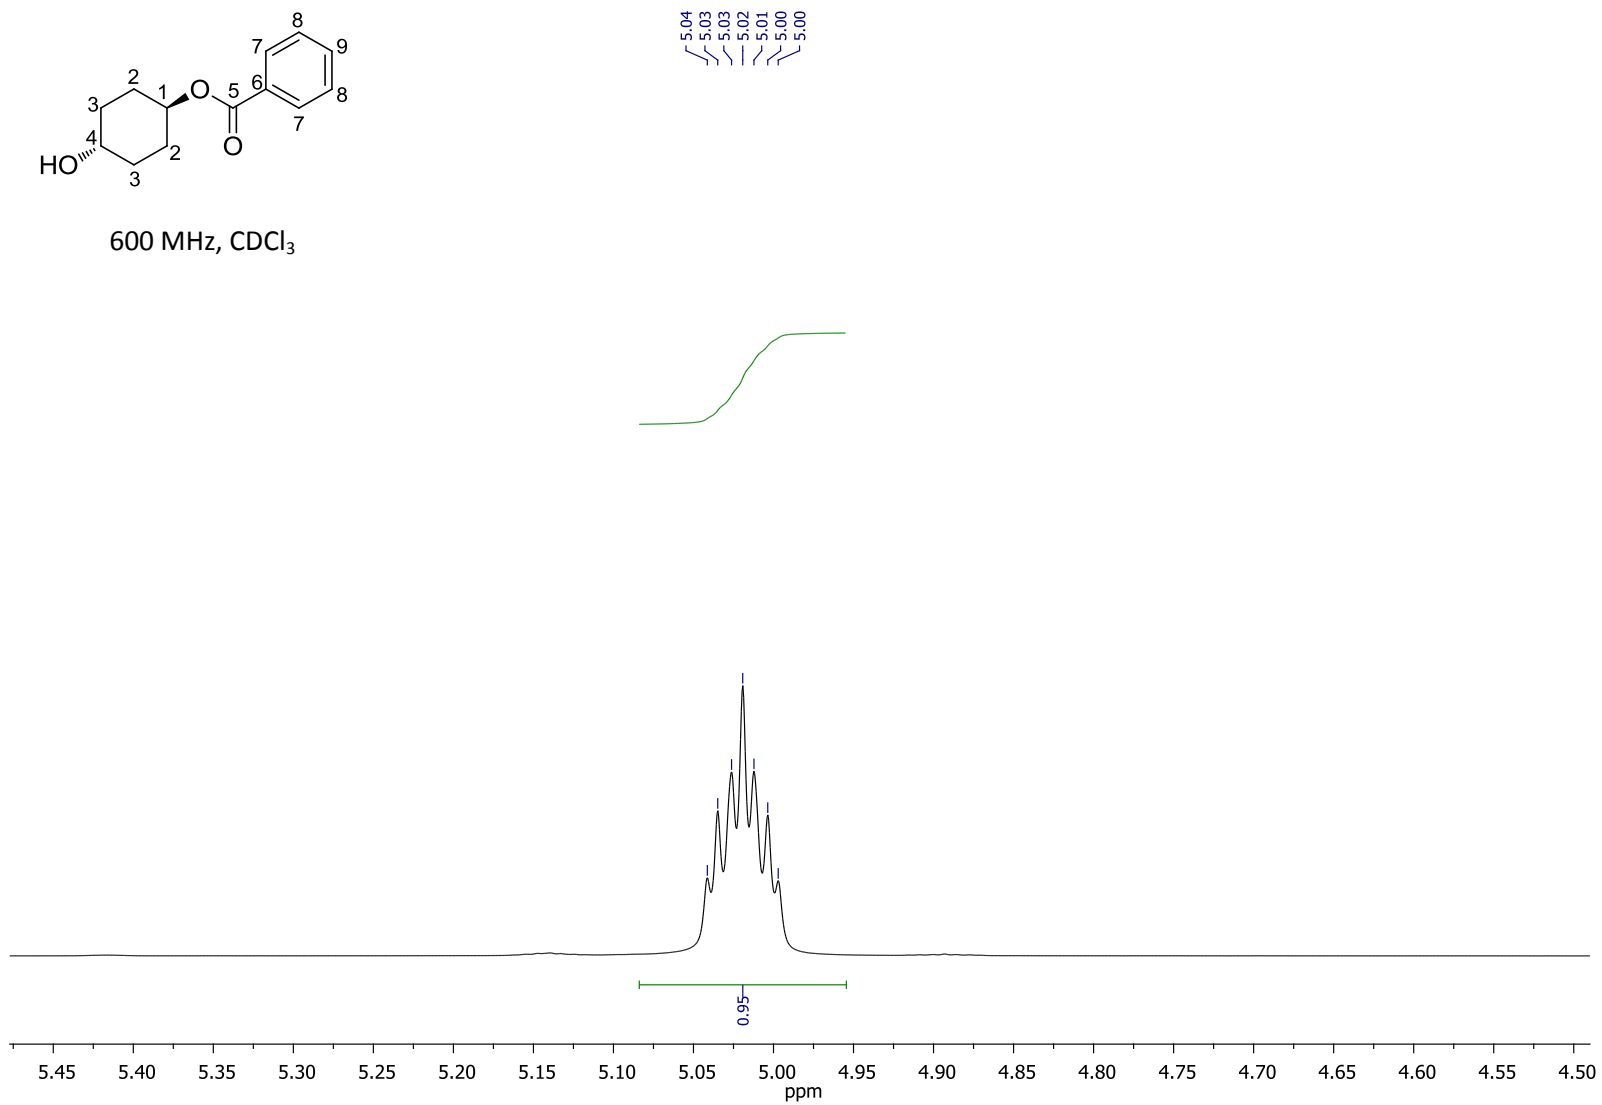

**Figure S5c** <sup>1</sup>H NMR spectrum of the C<sup>4</sup> hydrogen region of benzoic acid 4-hydroxy-cyclohexyl ester (**7**)

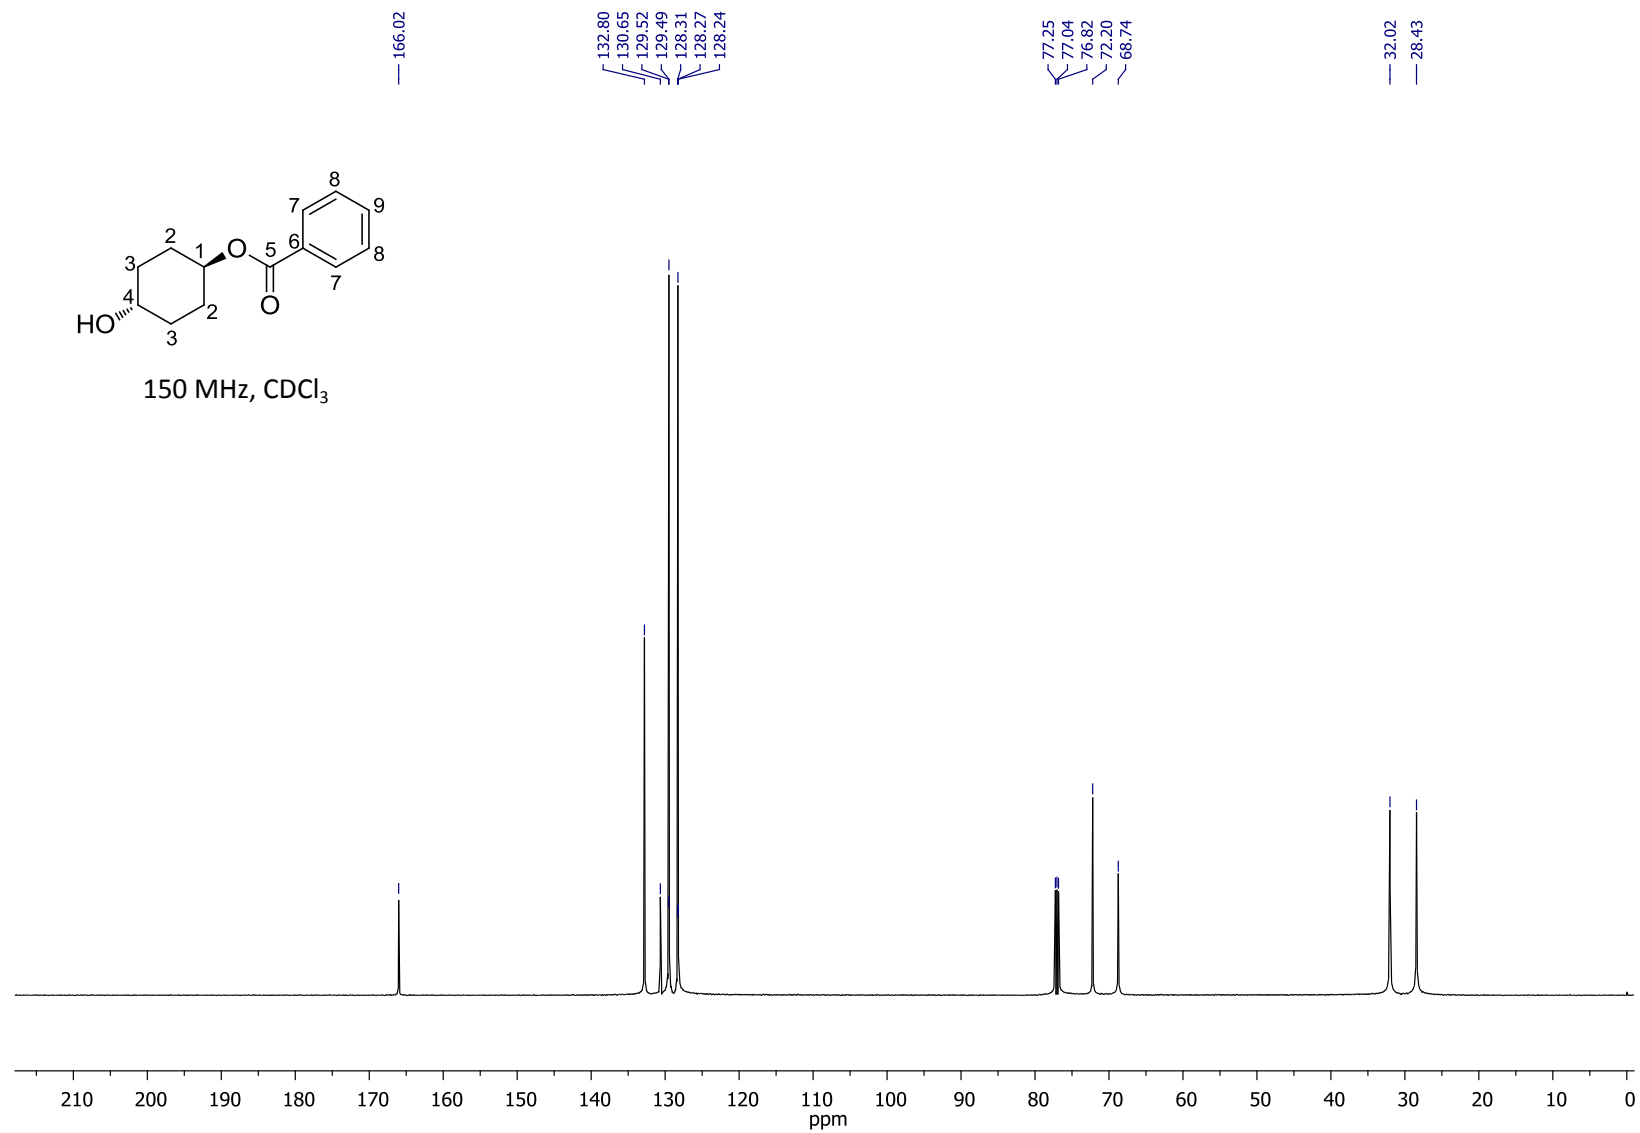

**Figure S5d** <sup>13</sup>C NMR spectrum of benzoic acid 4-hydroxy-cyclohexyl ester (**7**)

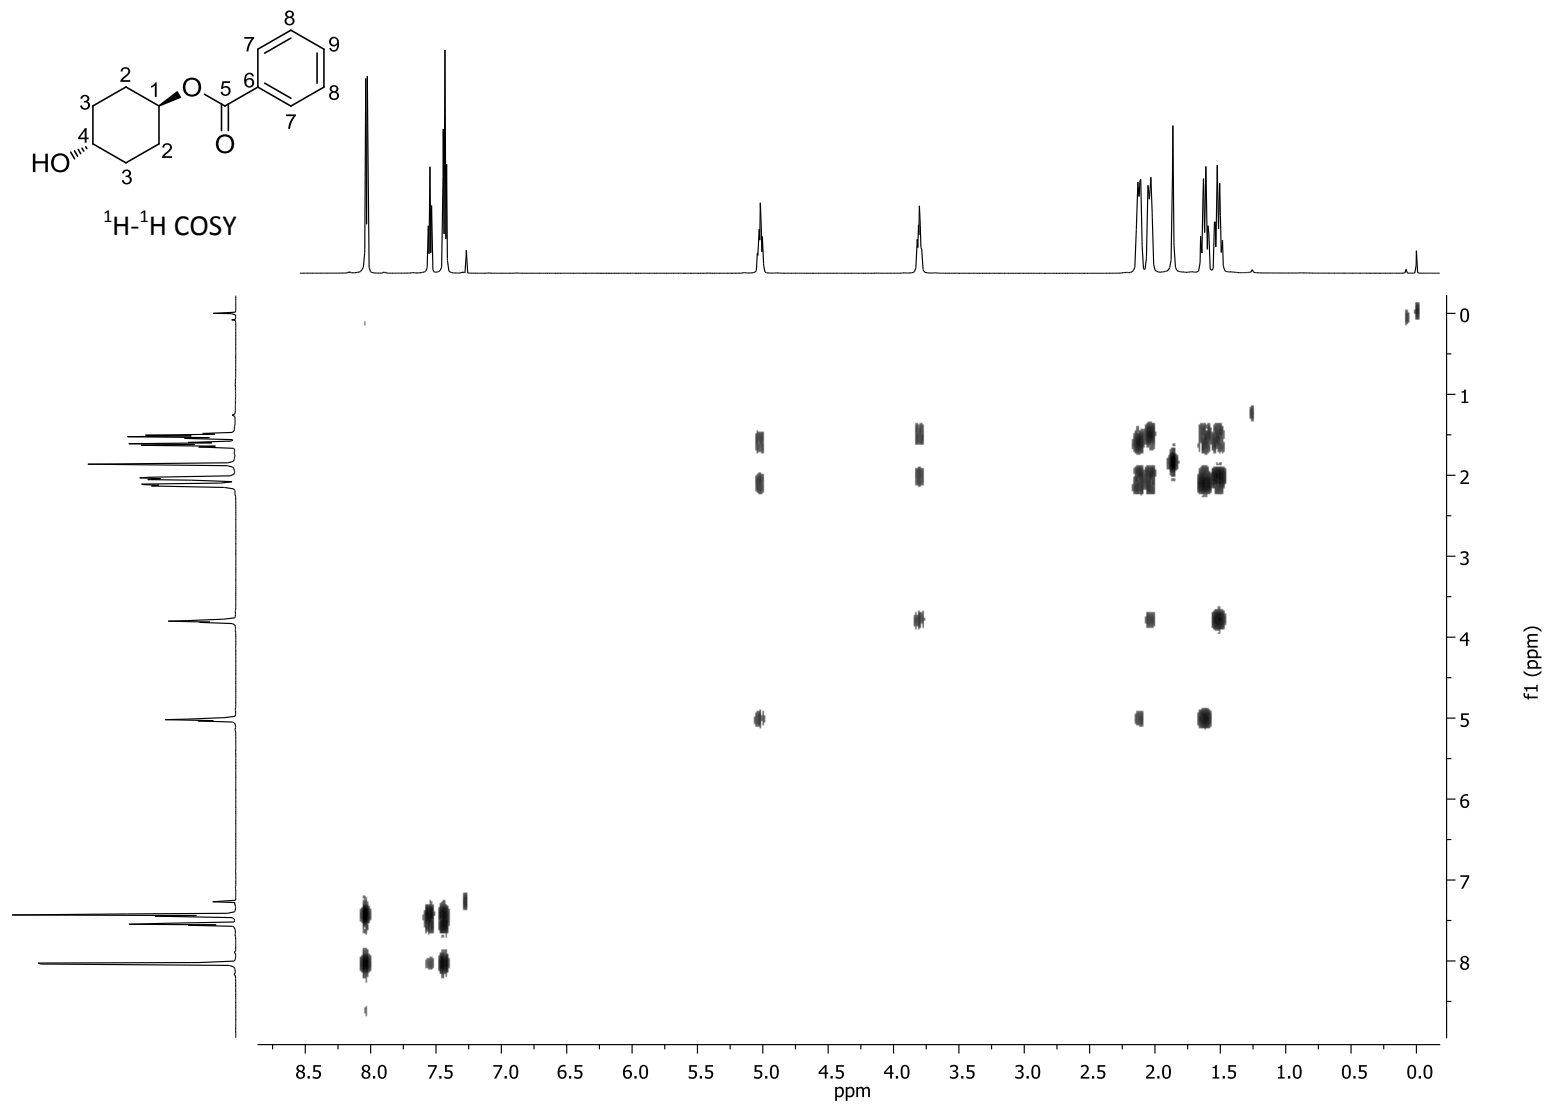

**Figure S5e**  $^1\text{H}$ - $^1\text{H}$  COSY spectrum of benzoic acid 4-hydroxy-cyclohexyl ester (**7**)

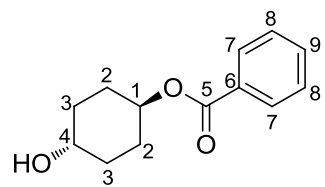

$^1\text{H}$ - $^{13}\text{C}$  HSQC

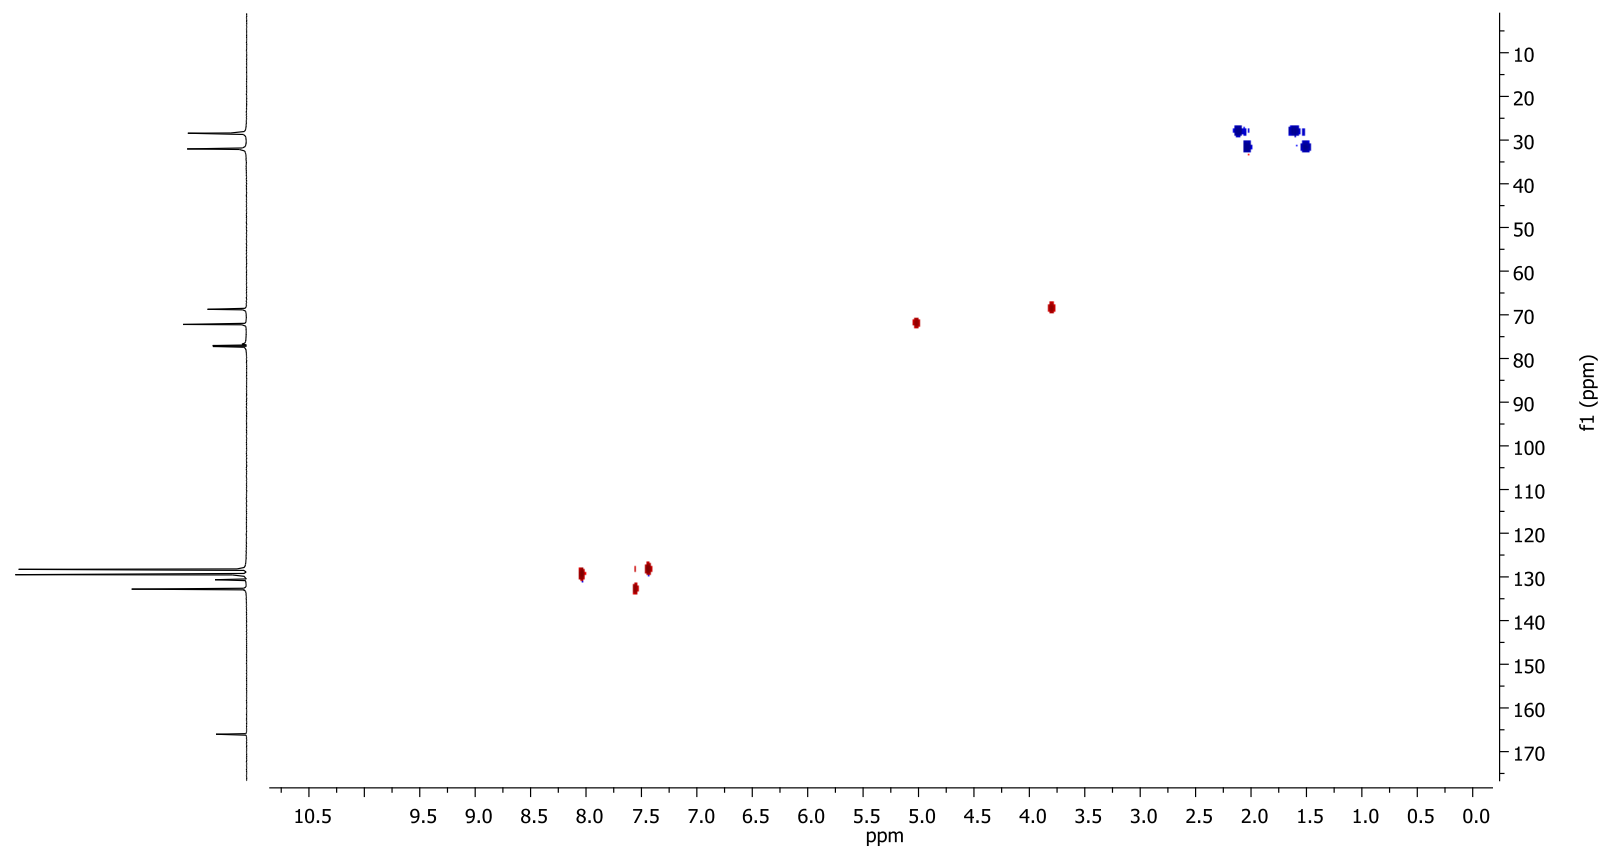

**Figure S5f**  $^1\text{H}$ - $^{13}\text{C}$  HSQC spectrum of benzoic acid 4-hydroxy-cyclohexyl ester (**7**)

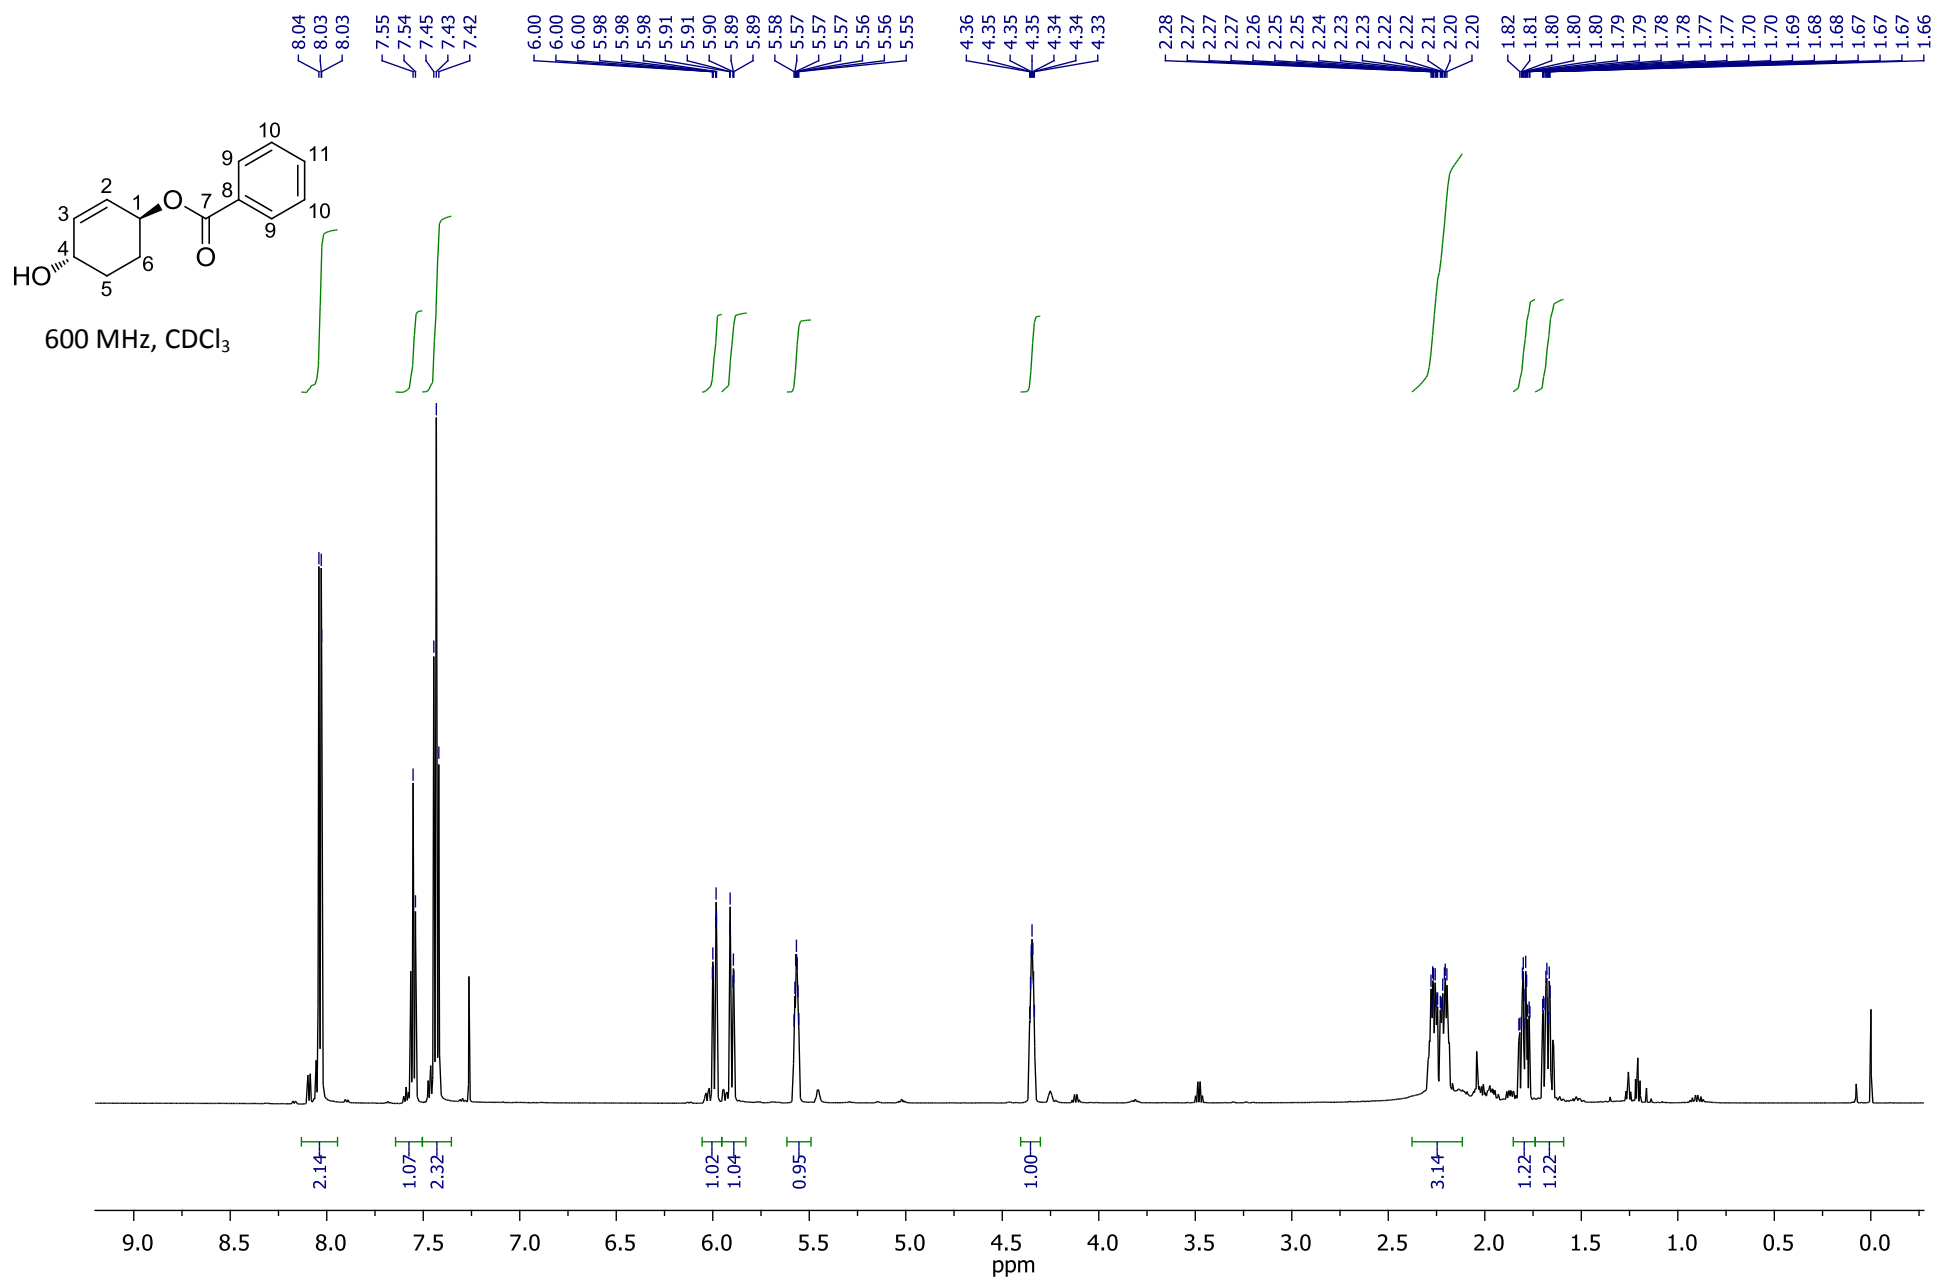

**Figure S6a**  $^1\text{H}$  NMR spectrum of benzoic acid 4-hydroxy-cyclohex-2-enyl ester (**8**)



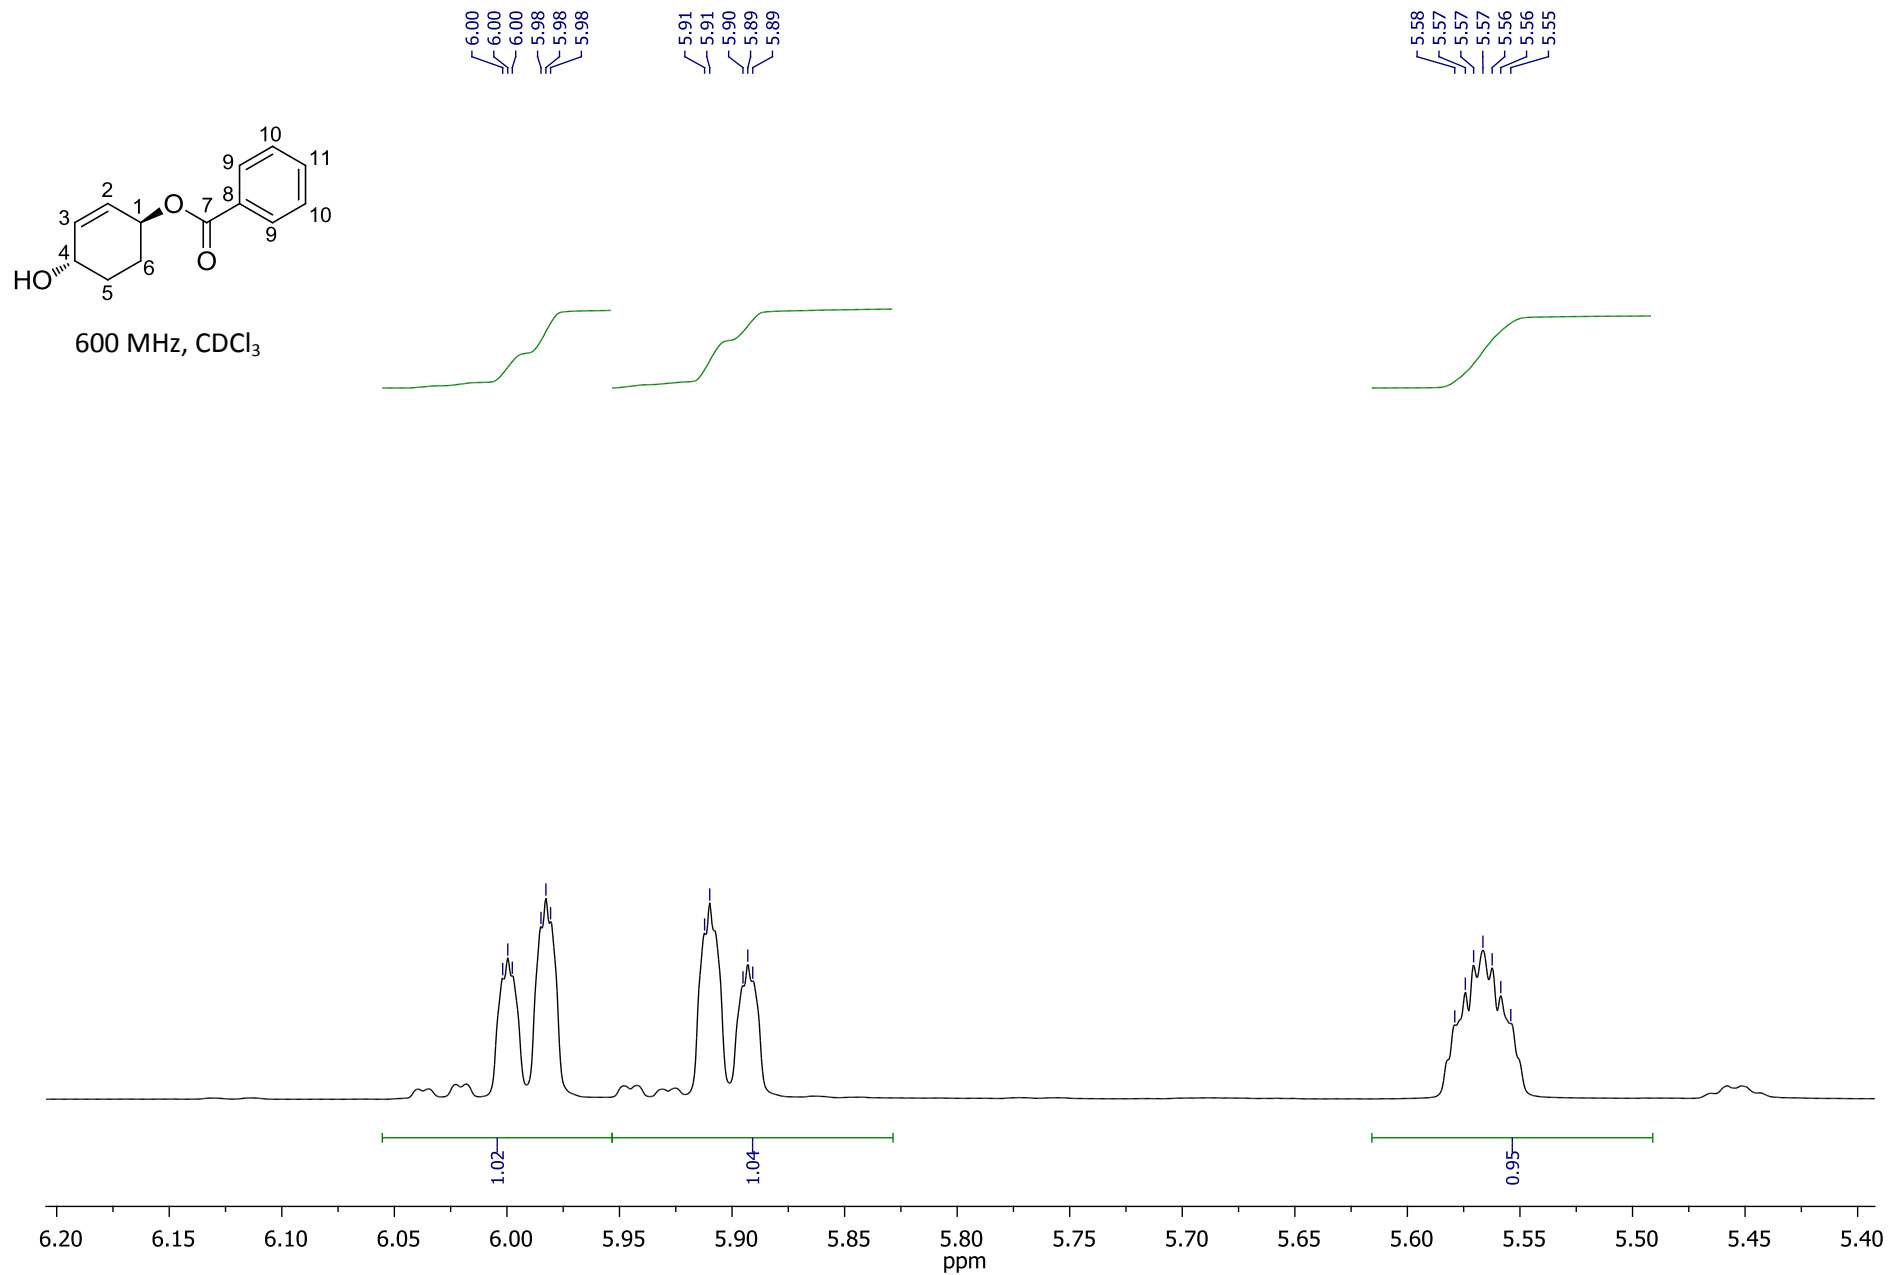

**Figure S6b** <sup>1</sup>H NMR spectrum of the C<sup>1</sup>, C<sup>2</sup> and C<sup>3</sup> hydrogen region of benzoic acid 4-hydroxy-cyclohex-2-enyl ester (**8**)

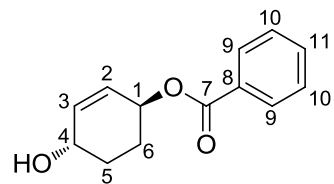

600 MHz, CDCl<sub>3</sub>

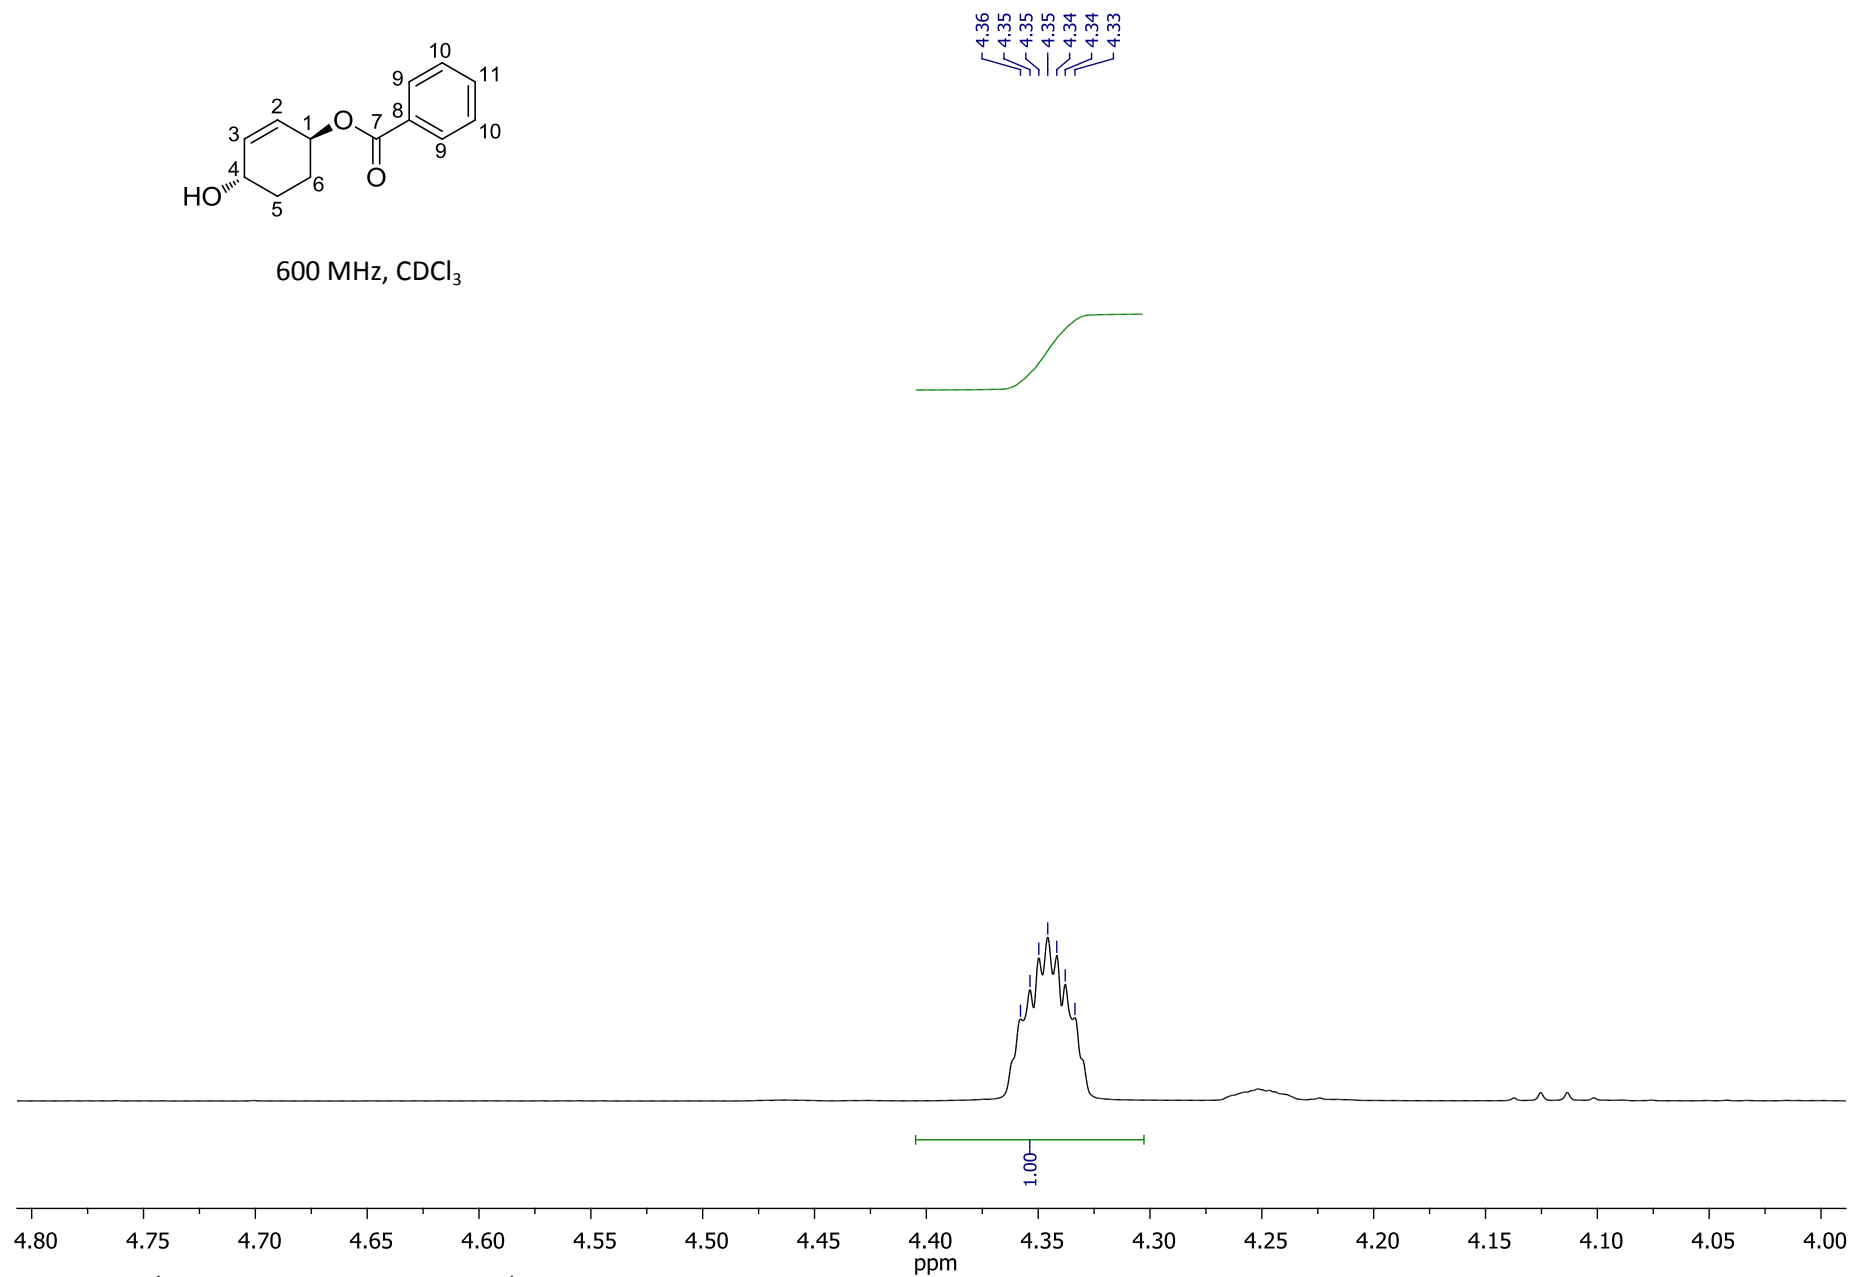

**Figure S6c** <sup>1</sup>H NMR spectrum of the C<sup>4</sup> hydrogen region of benzoic acid 4-hydroxy-cyclohex-2-enyl ester (**8**)

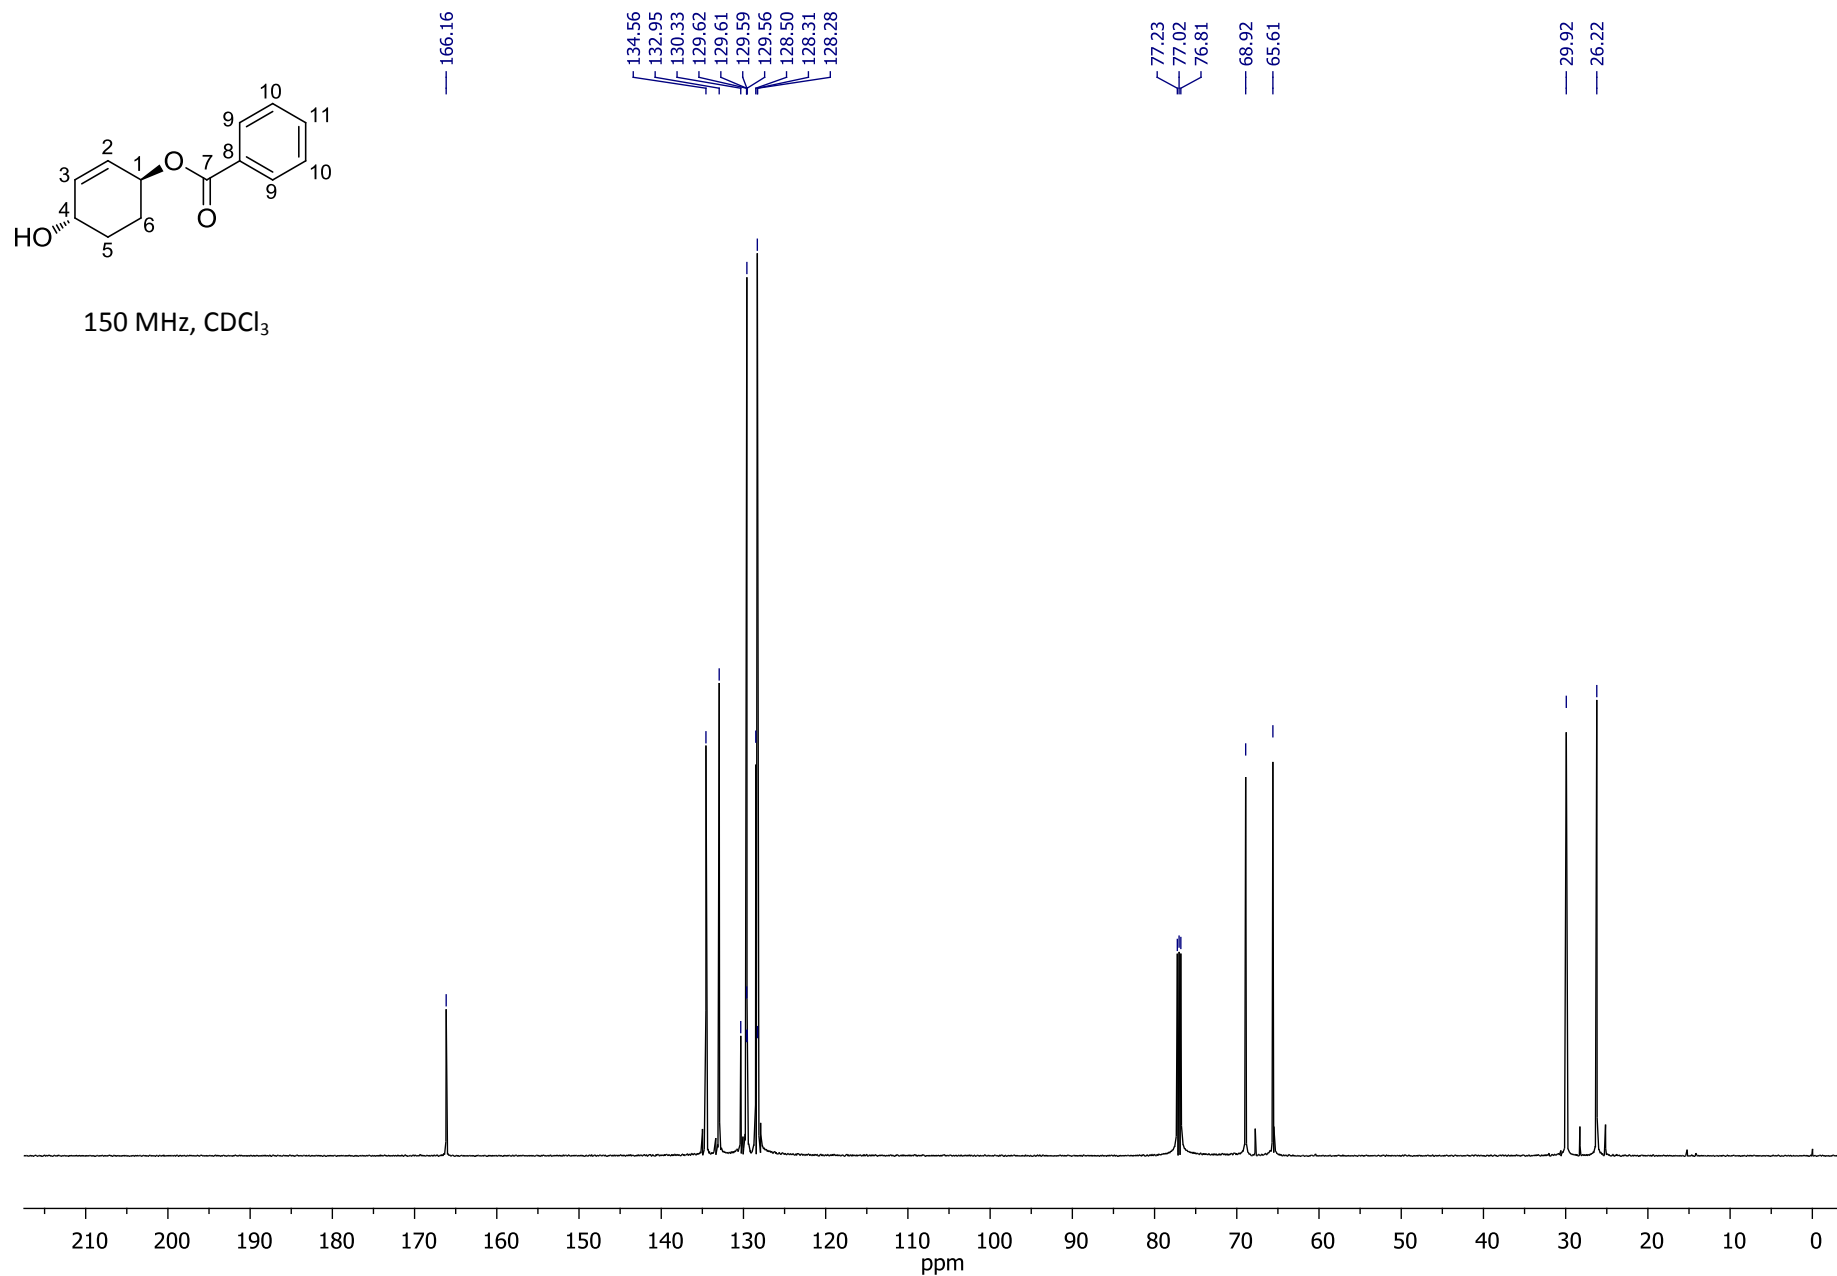

**Figure S6d** <sup>13</sup>C NMR spectrum of benzoic acid 4-hydroxy-cyclohex-2-enyl ester (**8**)

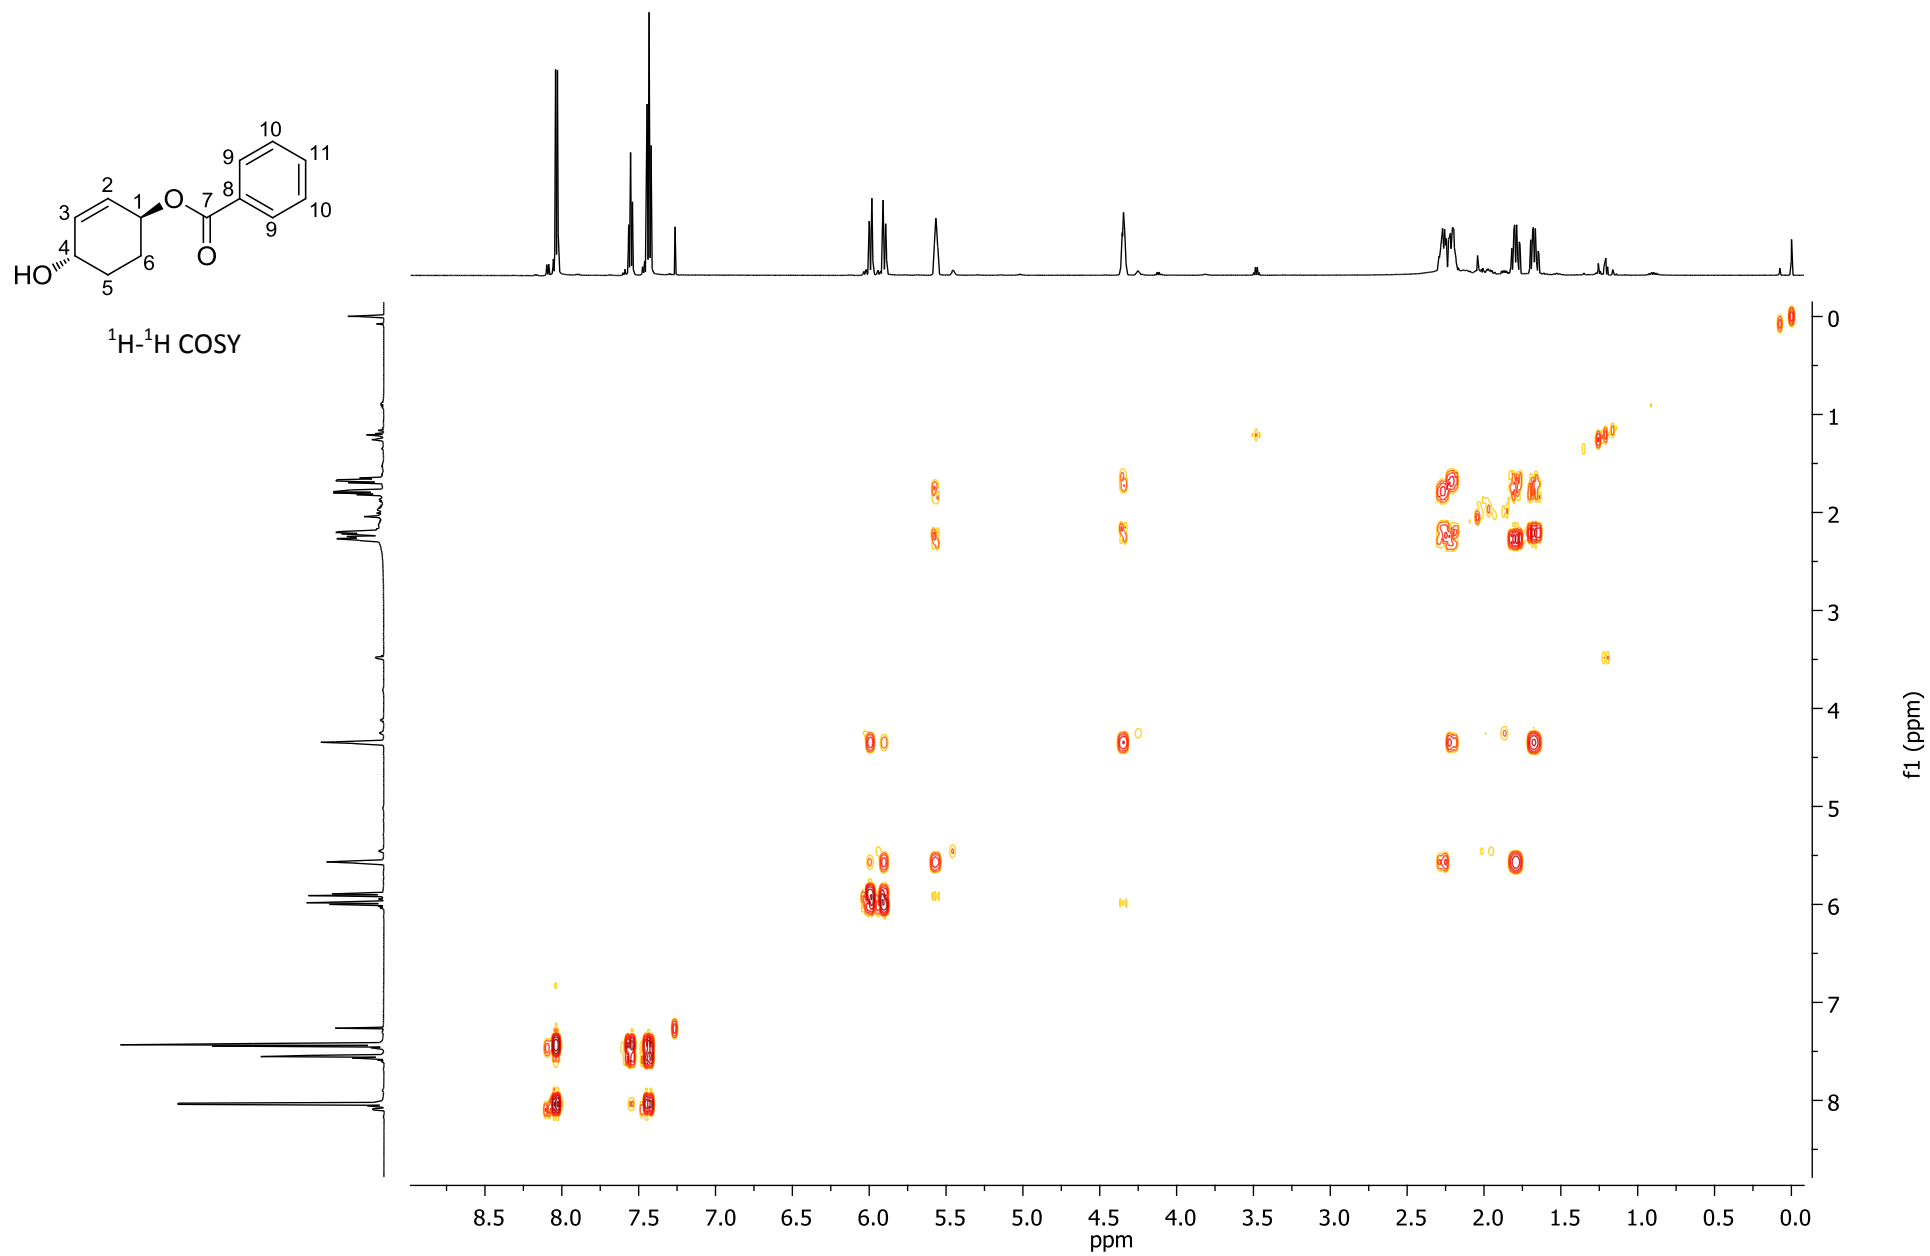

**Figure S6e**  $^1\text{H}$ - $^1\text{H}$  COSY spectrum of benzoic acid 4-hydroxy-cyclohex-2-enyl ester (**8**)

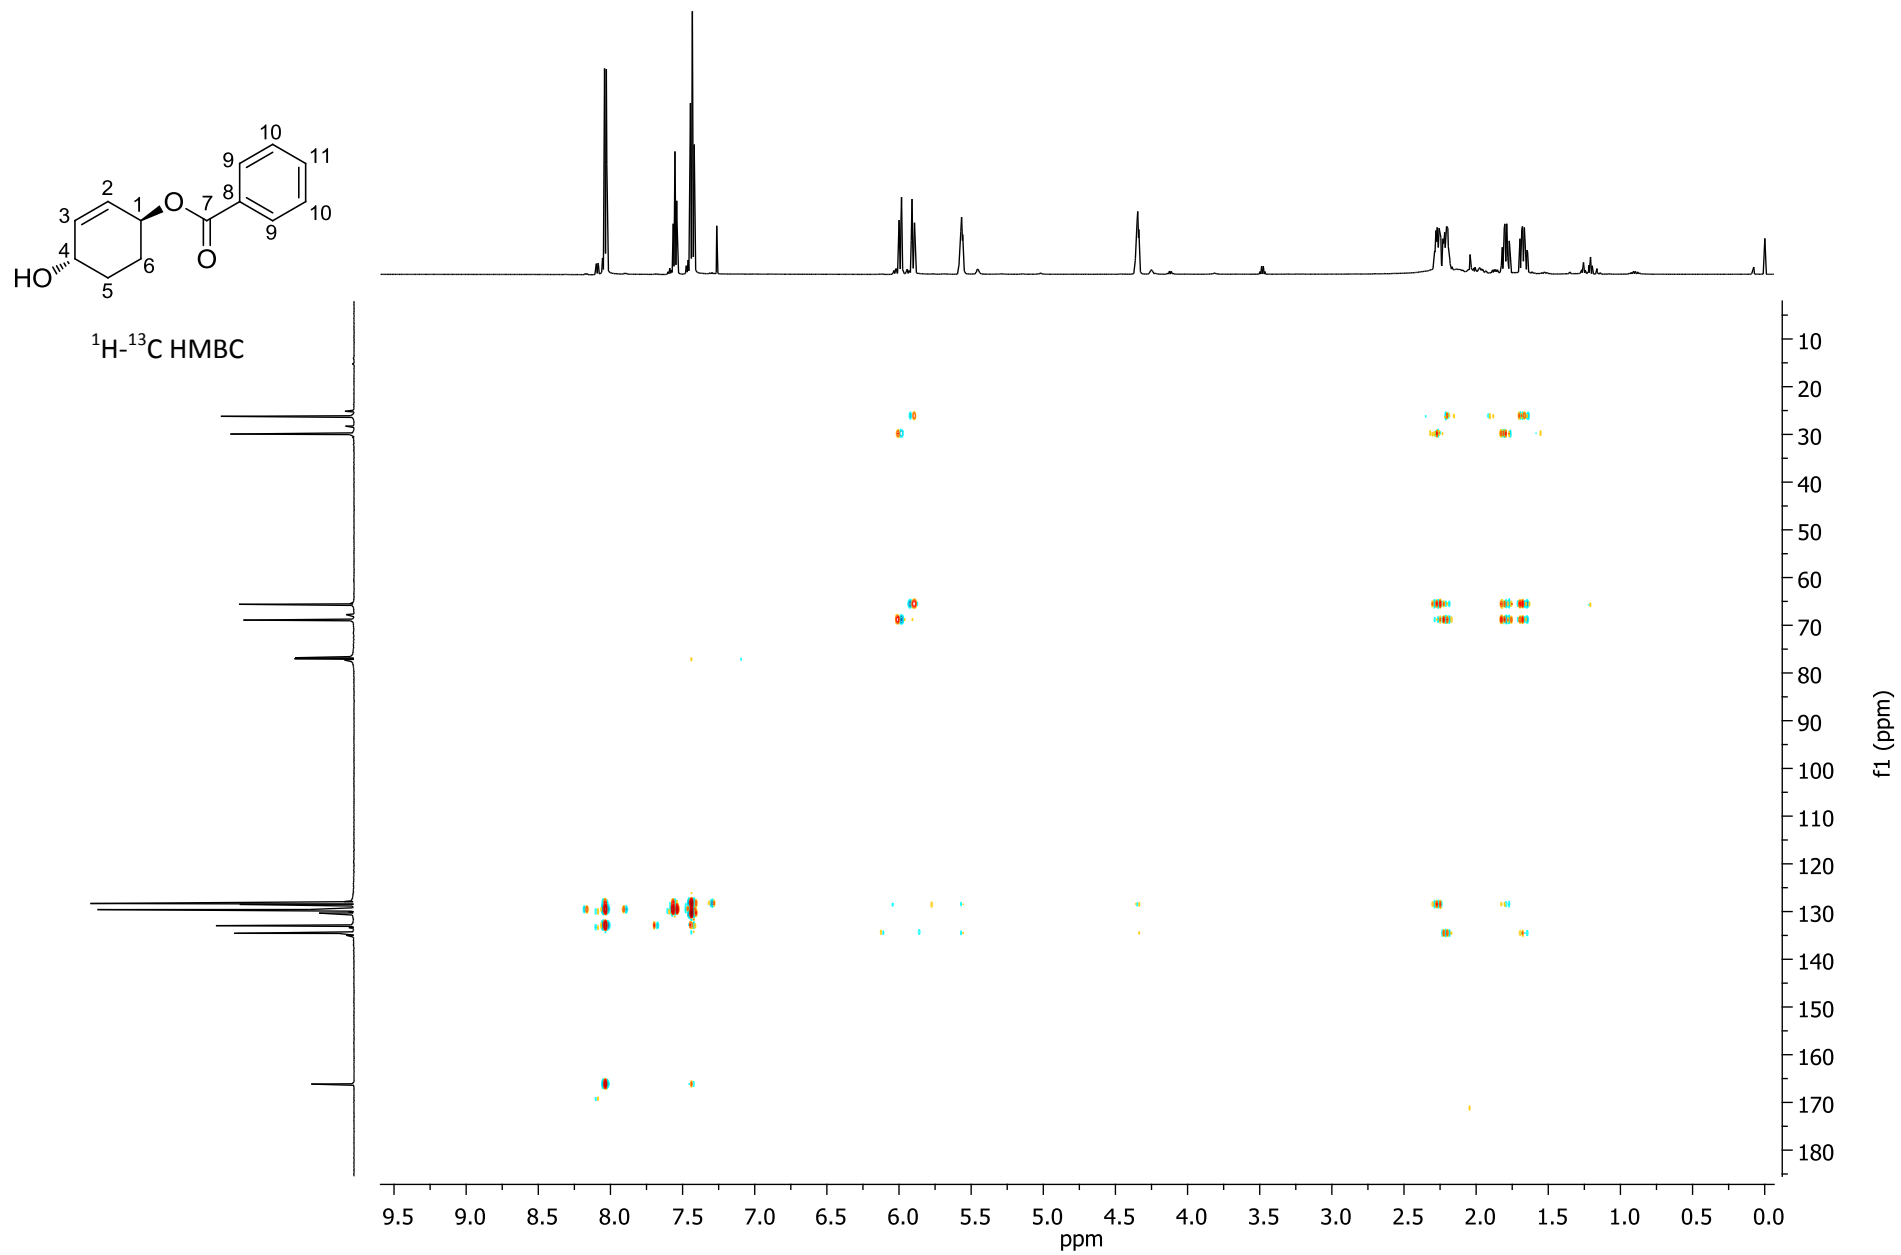

**Figure S6f**  $^1\text{H}$ - $^{13}\text{C}$  HMBC spectrum of benzoic acid 4-hydroxy-cyclohex-2-enyl ester (**8**)

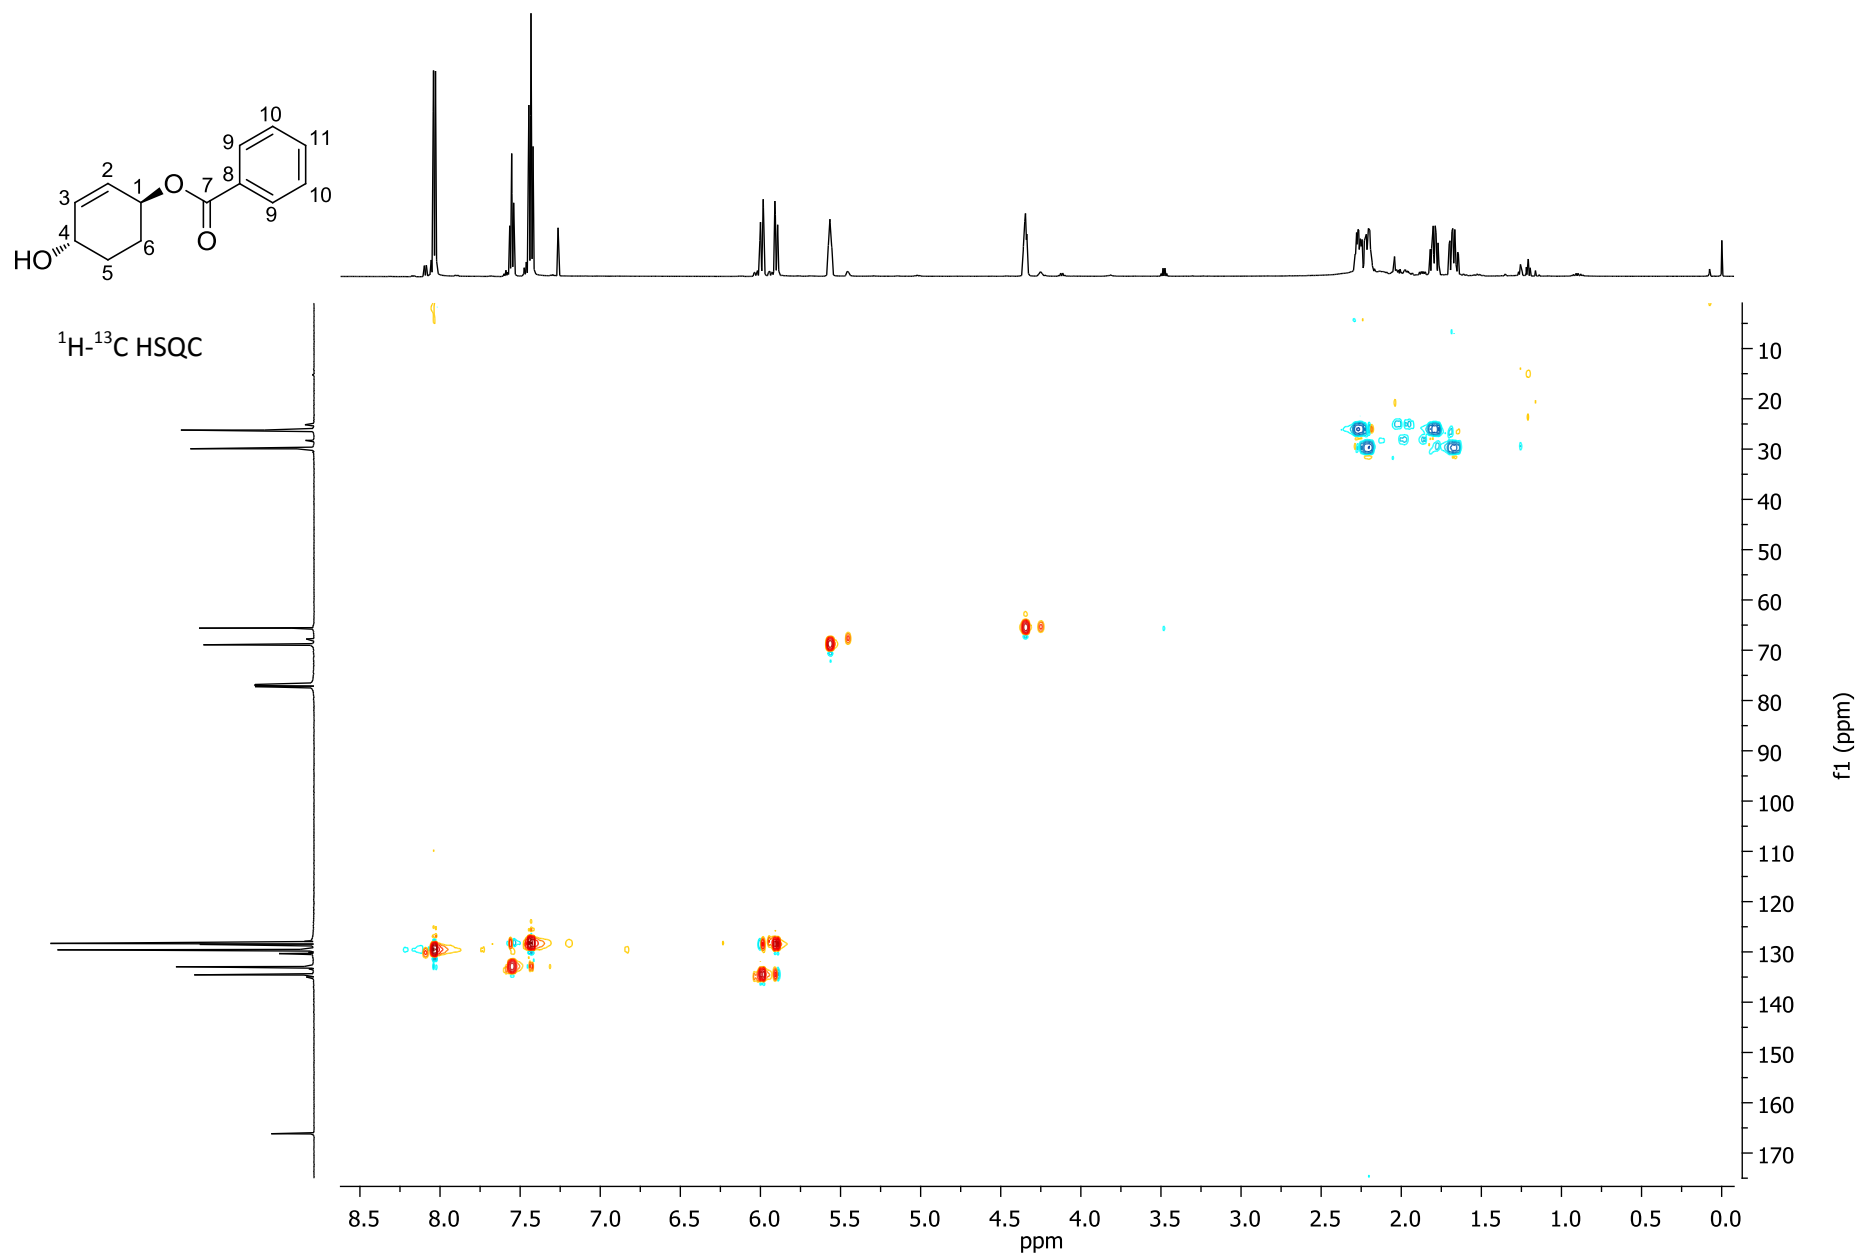

**Figure S6g**  $^1\text{H}$ - $^{13}\text{C}$  HSQC spectrum of benzoic acid 4-hydroxy-cyclohex-2-enyl ester (**8**)

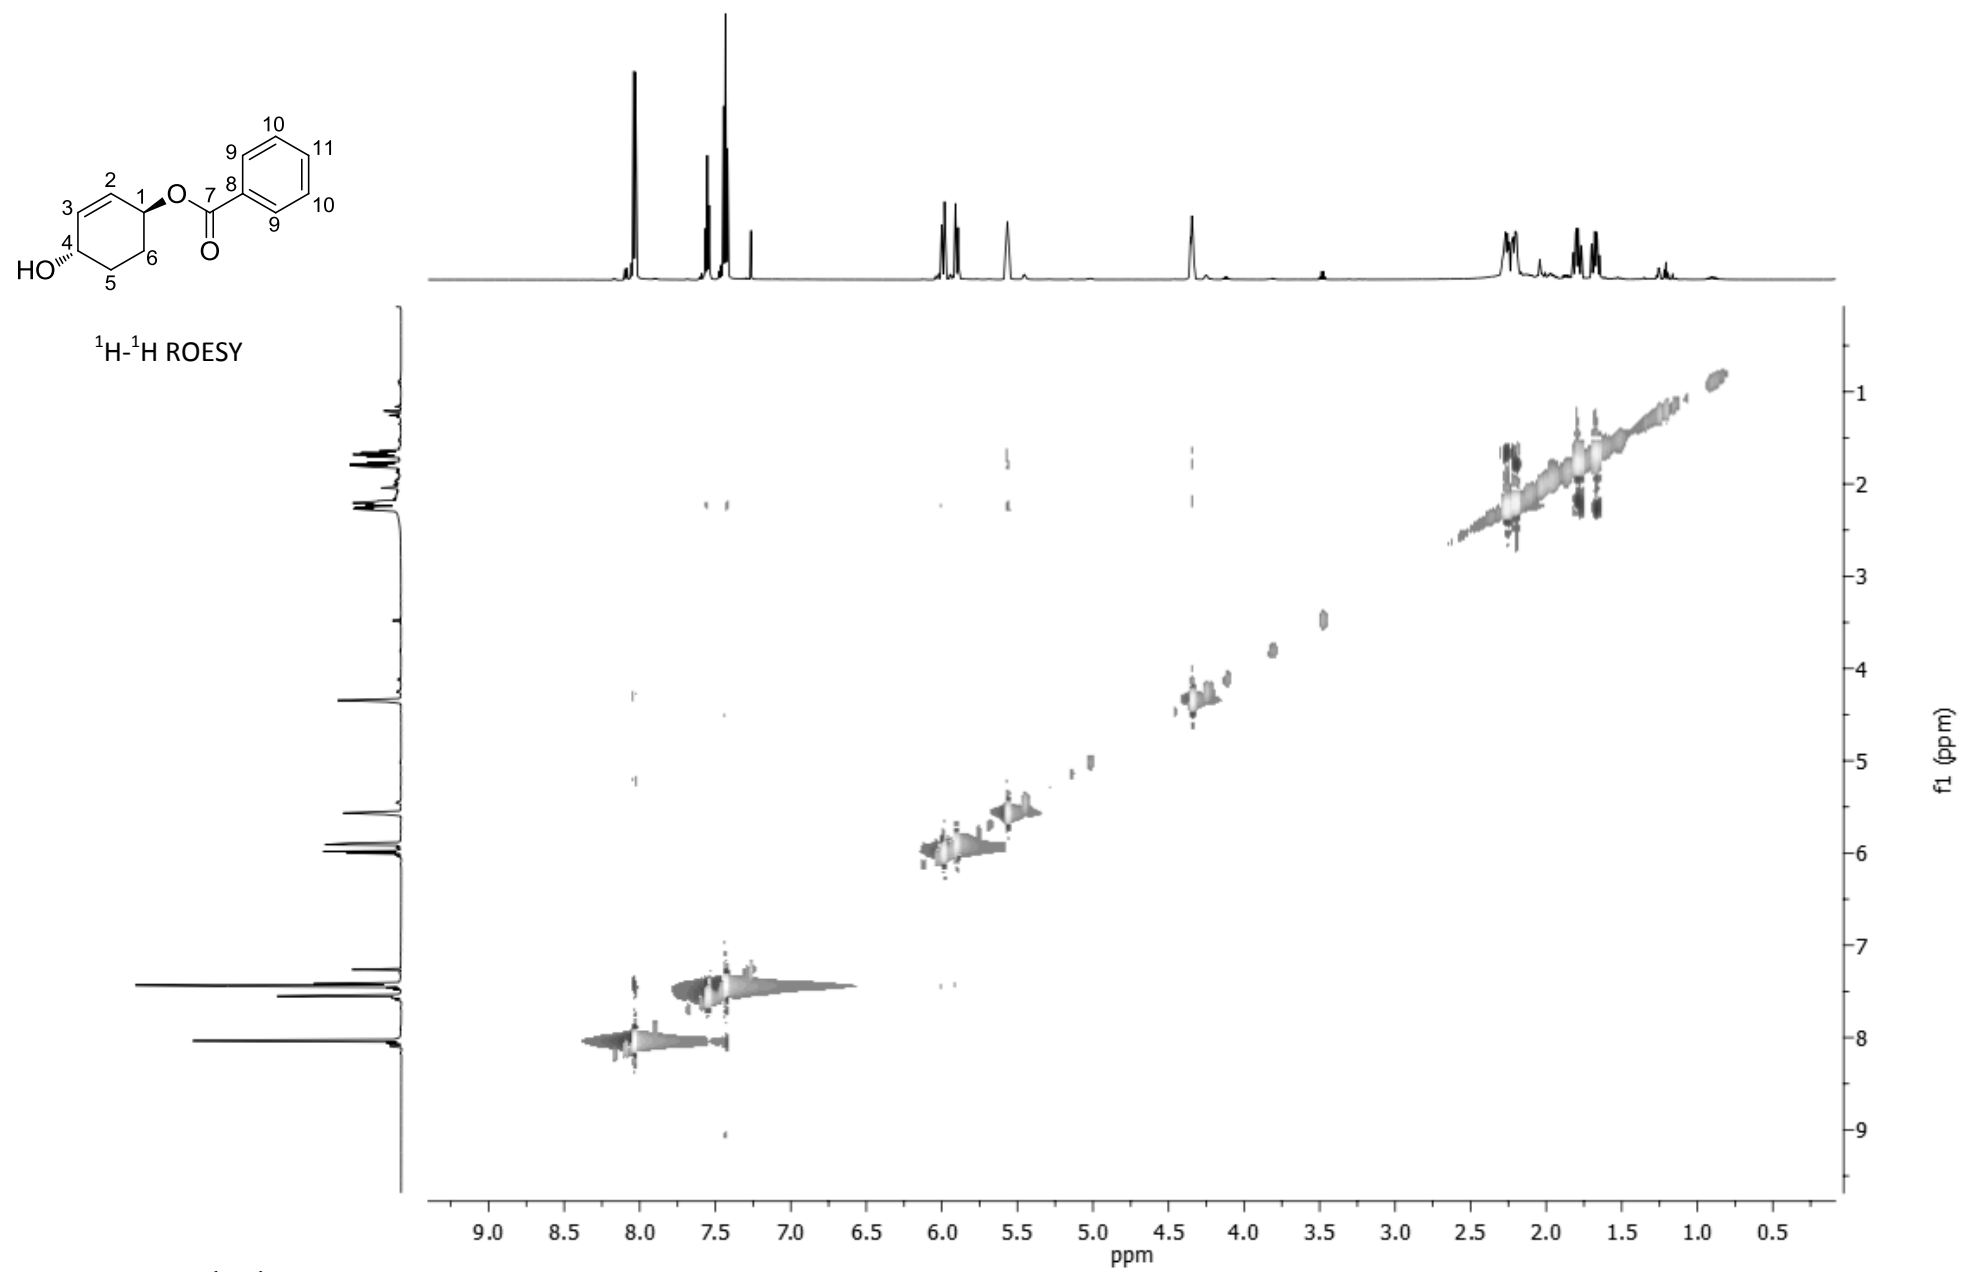

**Figure S6h**  $^1\text{H}-^1\text{H}$  ROESY spectrum of benzoic acid 4-hydroxy-cyclohex-2-enyl ester (**8**)

**Figure S7** Chiral chromatogram of Benzoic acid 4-hydroxy-cyclohex-2-enyl ester, **8**.

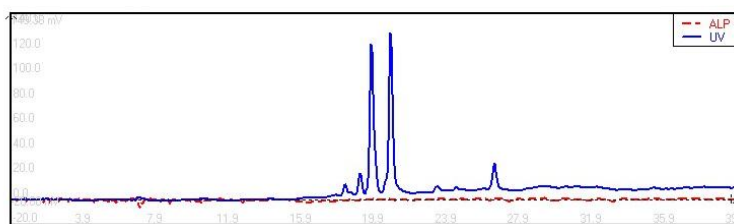

Supplement: c3ob42417k1.pdf [file c3ob42417k1.pdf]
